# Supplementary material for: Size-resolved aerosol and cloud condensation nuclei (CCN) properties in the remote marine South China Sea, Part 1: Observations and source classification
Source: Copernicus journal article supplement (doi:10.5194/acp-2016-645), 2016-07-21
Supplement: Supplementary file [file acp-2016-645-AC2-supplement.pdf]

We would like to thank the reviewer for their insightful comments and helpful suggestions. Each of the comments is listed below in bold text, with our response and corrections following each of them in plain text. We have made a number of small corrections to the manuscript for each of the specific comments as noted. In addition, we have conducted a general reorganization of the results and discussion sections pursuant to the general comments. We have included relevant updated sections in response to general comments, however it may be more effective to reference the marked-up manuscript included at the end of this document to fully address the noted concerns.

**General comments:**

**The paper presents a comprehensive and state-of-the-art aerosol size distribution and CCN dataset taken during a research cruise in the South China Sea. The aerosol cluster analysis in combination with the attribution of aerosol types to air masses and sources is interesting and relevant. The report of representative hygroscopicity values is very useful for the community. The paper is written in a good and clear language, but could be made more concise by dropping repetitions of observations. The scientific content is largely descriptive and should be made stronger by putting the results into context. This is particularly important for the following sections:**

**Conclusions: The meaning of the results should be carved out better and the conclusions made more specific. E.g. p.13, line 31: How exactly do the authors arrive at the conclusions that results are regionally and temporally representative (p. 13, line 31), and what are the further implications? What time period is meant by “temporally” – the season, a whole year? What “previous study”?**

Additional information on comparison of the 2012 study described in this work with the findings of the earlier 2011 pilot study (Reid et al., 2015) was included in the discussion section (included in the response to the discussion section comment) to address the question of the representativeness of these results to the wider SCS remote marine region in the Southwestern Monsoon (SWM) season.

Further, we have added additional components to the conclusion to address the implications of these results. Specifically, we focus on the use of aerosol population properties and their associated variances for providing aerosol microphysical representations appropriate for aerosol microphysical, cloud, and optical modeling of the region. The conclusion section has been updated to:

“5 Conclusion

This study reports ship based measurements of aerosol size distributions and CCN properties conducted as part of the first extensive, in situ aerosol measurement campaign in remote marine regions of the South China Sea/East Sea during the important Southwestern Monsoon and biomass burning season. Analysis of approximately two weeks of measurements found aerosol characteristics consistent with those from a previous pilot study in the region during the same season, indicating that descriptions of aerosol population types and the associated meteorological and transport phenomena that modulate changes and mixing between these populations may be representative of the wider remote marine SCS during the SWM season.

Eight aerosol population types were identified in the dataset that were associated with various impacts from background marine particles, smoke, and anthropogenic sources, as well as precipitation impacts and shorter lived events linked to influxes of VOCs or ultrafine particles. Efforts to measure or model the impact of aerosol on cloud development or atmospheric optical properties often rely on proper characterization of aerosol microphysics associated with impacts from various aerosol sources. As such, we provided population type average values and standard deviations for aerosol size distribution and hygroscopicity properties needed to model aerosol hygroscopic growth in humid environments or cloud development. Future work with this dataset will investigate the impact of the identified aerosol population types on CCN properties including supersaturation dependent CCN concentration needed to model development of different types of clouds. Reutter et al., (2009) identified specific regimes of cloud development where aerosol number concentration was important using a cloud parcel model, while Ward et al., (2010) found such results may be further complicated by aerosol size and hygroscopic properties. Inclusion of both population type average properties and the range that they vary across into such a model may help constrain when various properties of the aerosol are relevant to cloud development in the SCS. Additionally, differences in aerosol population type are expected to be relevant to studies of radiative transfer, optical propagation through the atmosphere, and satellite retrievals in sub-saturated marine environments where differences in particle number concentration, size, hygroscopicity, index of refraction, and relative humidity all affect the interaction radiation with particles in complex ways. Lastly, while specific observed aerosol population types were identified in this dataset, additional open questions remain regarding the relative importance of various sources and transport pathways of aerosol into remote MBL air masses and their impact on aerosol populations. Since the surface-based observations provide only a portion of the observations needed to construct a true aerosol budget for the MBL, the degree to which MBL aerosol may be impacted by mixing down from a reservoir aloft was not clear. Future airborne aerosol campaigns in the region may be useful to shed light on this important topic.”

**Aerosol Hygroscopicity: It would be nice if more of the CCN data and their significance were discussed and if they were put into more context. What supersaturations are expected to be relevant in the regionally typical cloud cover; are the ones chosen here representative? It would be nice if the impact of biomass burning and anthropogenic emissions on all CCN parameters (not just kappa) were carved out a little more.**

In order to provide a more thorough treatment of the CCN properties of the identified population types, the hygroscopicity result section (previously section 3.4) has been removed and its results included directly into the new section 3.2 that discusses each identified cluster type, with parts on background moved to the methods section 2.1. Activated fractions and CCN concentrations across the range of measured supersaturations for population types are now briefly discussed in this section as well. The discussion now has several added paragraphs that place the CCN results in context and explain their significance (see response to the Discussion comment). A sentence was added to section 2.1 regarding choice of supersaturation settings for CCN measurements:

“The measured range of 0.14% to 0.85% supersaturation was selected based on values that could both be reliably measured by the CCNc instrument and represented supersaturations expected in the region where aerosol effects may be relevant, ranging from marine stratocumulus with peak supersaturations often below 0.2% to highly convective clouds with supersaturations above 1% (Reutter et al., 2009; Ward et al., 2010; Tao et al., 2012).”

We also agree that additional treatment of the CCN data and its significance for aerosol-cloud-precipitation interactions in the region is warranted. However, we believe a full treatment of the variability of CCN properties for each population type and their implications in the region requires a more thorough analysis than is feasible within the scope of this manuscript. Here, we intended to focus more on the classification of aerosol population type using the cluster model, and description of the associated aerosol and CCN properties. We have made this point clearer in the conclusion to describe intended future work on CCN properties associated with the identified population types.

**Introduction: The first paragraph (especially up to line 11) should be made more specific. For example, lines 7 and 8: Which additional questions? Representativeness of which results? Also, the first sentence of the introduction is somewhat unfortunate. It begs the question: Why is it important to assess aerosol properties there in the first place? The region and its significance to aerosol research need to be more clearly introduced to the reader.**

We have updated the introduction to provide some additional justification for the study of aerosol properties and specifics as to the open questions regarding its study in the region. The first paragraph now reads:

“In the Southeast Asian Maritime Continent (MC) and South China Sea/East Sea (SCS) aerosol particles are expected to play an important role modulating cloud development, precipitation, and radiative properties that affect heat transfer through the atmosphere (Reid et al., 2013). Assessment of aerosol properties important to understanding such processes in remote marine segments of this region has proven difficult. Extensive cloud cover confounds remote sensing and leads to a clear sky bias in observations (Feng and Christopher, 2013; Reid et al., 2013). Aerosol monitoring has largely been confined to urban centers that are often dominated by local emissions, while in-situ sampling in remote areas has been limited in duration and scope (Irwin et al., 2011; Robinson et al., 2011; Lin et al., 2014; Reid et al., 2015). Airborne measurements have provided some representation of aerosol over wider regions and at various levels (Hewitt et al., 2010; Robinson et al., 2012), but additional questions regarding the representativeness of such point measurements across larger time scales remain. Similarly, the impact of various aerosol sources on surface properties and concentrations in remote marine regions, and their relationship to expected transport pathways and the few remotely sensed column measurements that exist is not well understood. Thus, over these remote ocean regions the aerosol optical and physical properties, their variability in time and space, and the processes controlling aerosol lifecycle have not been well constrained. This uncertainty in the aerosol environment itself comes in addition to uncertainty about its impacts on meteorological processes. Aerosol concentration has been found to relate to cloud development, cloud microphysics, and precipitation formation in the region (Yuan et al., 2011; Wang et al., 2013),

while smoke may affect cloud droplet size distributions and the onset of precipitation, similar to processes observed in other tropical regions impacted by biomass burning (Rosenfeld, 1999; Andreae et al., 2004). Improved knowledge of the aerosol environment and aerosol-cloud-climate relationships in the Southeast Asian region has therefore been identified as important regionally, and in regards to links with global climate and large-scale aerosol budgets (Reid et al., 2013).”

**Discussion: Currently, the section contains mostly repetitions of observations discussed earlier in the paper, and a couple new observations and interpretations. It should be re-worked such that it ties up the results in a way that leads to the conclusions. Alternatively, it could simply be eliminated (the new observations could be discussed in the “results” section).**

The discussion section was intended to provide a coherent description of the nature and causes of changes to the aerosol environment encountered during the cruise, in the context of the previously identified population types. In order to emphasize this conceptual picture of background marine aerosol mixing with other sources and changing due to various phenomena in the discussion, we have first simplified the results section to remove unnecessary repetition and discussion of aerosol measurements.

The results are now presented as a brief overview of the study cruise in section 3.1, followed by a description of the results of the cluster analysis, including hygroscopicity and CCN properties, in section 3.2.

The discussion section is now more clearly constrained to emphasize two points. First, the conceptual model of mixing that follows from the basic clustering results and provides a justification for why the cluster model is appropriate for this analysis is discussed. Second, the CCN results are placed in context against expectations and other reported values.

#### “4 Discussion

Based on this classification of the SCS remote marine boundary layer aerosol environment, a conceptual picture emerges as to the nature and sources of particles encountered during the Vasco 2012 cruise. A bimodal marine aerosol background was present with number concentrations usually between about 300 and 700  $\text{cm}^{-3}$  and a Hoppel minimum around 90 nm. Primary emissions via sea spray supply submicron particles consisting of a mixture of sea salt and organic components, with emitted particle diameters as small as 20 nm (Clarke et al., 2006; O’Dowd and Leeuw, 2007; Prather et al., 2013). However, even in remote marine environments transported anthropogenic and combustion aerosol may still be an important or even dominant source of small particles (Shank et al., 2012). The background marine population identified in this study is therefore considered a background state across the remote SCS that is likely comprised of a mixture of primary marine emissions along with particles derived from anthropogenic and biomass burning sources throughout the region. Departures from the typical range of background marine characteristics and number concentrations occurred under large influxes of aerosol from other sources, such as smoke from biomass burning regions, anthropogenic pollution from population centers or shipping, or when convection and precipitation removed much of the ambient particulate matter and created relatively clean air masses.

During the SWM when large amounts of biomass burning aerosol were being advected into the SCS, a population of aged, accumulation mode smoke particles was periodically injected into

the MBL where it mixed with existing particles. When total particle concentrations were above roughly  $1500 \text{ cm}^{-3}$  (Figure 3), the smoke particles dominated the background marine particles and had characteristic size distribution parameters and hygroscopicities that remained roughly constant regardless of further increases in the concentration of biomass burning particles. In situations when smoke concentrations were insufficient to dominate the background marine aerosol population, smoke mixed with the background marine population, yielding size distribution and hygroscopicity parameters in between the two types. While the background marine type was earlier noted to be impacted to some extent by background anthropogenic or terrestrial aerosol similar to impacts noted for the mixed marine type, the later was characterized by mixing with a separate, distinct aerosol population, but at levels that were insufficient to dominate the background aerosol properties.

Precipitation removed particles that had been advected into the region, returning the environment near the surface to its background marine background state. However, when extensive precipitation occurred, accumulation mode particles were removed by wet deposition to a greater extent than Aitken mode particles, leading to lower overall surface number concentrations that were dominated by smaller particles, as evidenced by the emergence of a distinct precipitation population type from the cluster analysis. Based on the two Vasco cruises, the cleanest periods were encountered in cold pools following the passage of squall lines with number concentrations as low as 100 to  $150 \text{ cm}^{-3}$ . During these periods, increased number concentrations of coarse mode aerosol were regularly observed (Figure 5;  $\text{CN}>800: 5.5 \pm 2.1 \text{ cm}^{-3}$ ), that constituted a potentially important additional source of total CCN not measured by the CCN system ( $0.14\% \text{ SS}: 44 \pm 25 \text{ cm}^{-3}$ ;  $0.38\% \text{ SS}: 70 \pm 36 \text{ cm}^{-3}$ ), particularly at low supersaturations where they would be expected to activate first.

In addition to these findings, several observed phenomena during the 2012 study were similar to those from the 2011 cruise (Reid et al., 2015). In particular, rapid changes in aerosol properties and source type were noted in the wake of squall lines that left clean air masses in their wake, while longer period fluctuations on the order of days occurred as impacts from anthropogenic and smoke transport mixed with cleaner background marine and precipitation impacted air masses. As both studies were conducted in the remote marine SCS during the biomass burning season and saw similar meteorological phenomena modulating the aerosol populations, the more detailed aerosol property results of the 2012 cruise may be representative of the general nature of changes in SCS remote marine aerosol during the SWM season. Future work in the region to compare surface properties with model results and satellite retrievals will be ultimately required to fully validate these findings.

While the cluster analysis assigned each data point to a single cluster, in reality these first four clusters could be better described as a spectrum due to the variable impacts of mixing or meteorological processes, rather than as distinct or mutually exclusive population types. As is evident in Figure 3, overlap between these four clusters occurred in the parameter space for all nine of the measured variables used in the cluster model. Deviations from this general picture arose when influxes of other aerosol types occurred. The additional population types each mapped out generally distinct areas in one or more of the parameters, leading to their identification by the cluster model. That such clusters corresponded to temporally distinct periods with physical and meteorological relevance ultimately justified the use of the cluster

model to classify aerosol population types and assign rough population boundaries to the parameter space.

While the spectrum of mixing between population types is relevant to the identification of impacts from various sources, additional consideration of these aerosol types against measurements in other regions is also warranted. Fresh sea spray particles, dominated by sodium chloride ( $\kappa = 1.28$ ), are expected to have the highest  $\kappa$  values (Good et al., 2010), although co-emitted organic species and replacement of chlorine by uptake of acidic gases can potentially reduce hygroscopicities. Additionally, increasing organic fractions at smaller sizes have been reported in sea spray aerosol (Prather et al., 2013), leading to decreased hygroscopicities as particle size decreases. Such findings are consistent with the lower Aitken mode hygroscopicities found in the background marine populations observed in this dataset, as well as the additional decreases in hygroscopicity noted in the precipitation population that had been further scrubbed of larger accumulation mode particles.

Aged biomass burning aerosol have often been found to have  $\kappa$  values below 0.2 (Andreae and Rosenfeld, 2008; Petters et al., 2009; Engelhart et al., 2012), below the smoke population type average of approximately 0.4 in the accumulation mode during this study. However, high concentrations of both SO<sub>2</sub> and sulfate aerosol (ammonium sulfate,  $\kappa = 0.61$ ) from numerous sources have been observed in the MC (Robinson et al., 2011; Reid et al., 2013). During this study, multi-day filter samples showed average sulfate concentrations between approximately 0.8 and 3  $\mu\text{g}/\text{m}^3$  at the Vasco, potentially increasing during periods of smoke impacts due to burning of sulfur rich peat in the region (Reid et al., 2016). The potential peat source or mixing with other sources of sulfate may explain the higher than typical  $\kappa$  values observed for aged biomass burning aerosol in the MC.”

#### **Specific comments:**

**Abstract, line 19: this needs to be re-worded. Right now, the reader might get the impression that the “additional onboard (. . .) model products for the region” somehow entered the cluster analysis.**

We have split this sentence into two in order to clarify this point. It now reads:  
“Eight aerosol types were identified using a K-Means cluster analysis with data from a size-resolved CCN characterization system. Interpretation of the clusters was supplemented by additional onboard aerosol and meteorological measurements, satellite, and model products for the region.”

**Page 3, lines 16-19 should be moved to section 2.2. What time of day was chosen for the HYSPLIT trajectory arrival? How were the other initial conditions (especially arrival height) motivated?**

We have moved this paragraph to the end of section 2.2 and amended the paragraph as follows:

“The NOAA Hybrid Single Particle Lagrangian Integrated Trajectory (HYSPLIT) Version 4.9 model (Draxler et al., 1999; Draxler and Hess, 1997, 1998) was used to generate daily 72-hour backtrajectories (spawned at 0Z, 8 AM local) from the Vasco location with arrival heights of 500m to indicate likely marine boundary layer transport patterns. The GDAS1, 1° x 1° HYSPLIT

meteorological dataset was used to drive the model. Trajectory paths were found to be largely influenced by synoptic scale changes in the regional meteorological state of the atmosphere, with no substantial differences due to arrival time of day. Arrival heights between 100 m and 3000 m were examined. Trajectories with arrival heights below 1000 m were generally consistent and representative of boundary layer transport (Atwood et al., 2013; Xian et al., 2013), while higher heights tended to be increasingly influenced by free troposphere transport pathways with a more westerly component. As such, 500 m was selected to be representative of general shifts in synoptic scale boundary layer transport pathways, though more complex vertical interactions and mixing from aloft are a potential influence in the region (Atwood et al., 2013). Trajectory lengths of 72 hours were found to be sufficient to demonstrate general transport path differences between ocean dominated regions of the central portion of the SCS and more terrestrially influenced regions that passed closer to Borneo and Sumatra.”

**Page 3, line 21: What was the height of the mast above the water?**

We have added “approximately 10 m above the water surface” to this sentence.

**Page 3, line 29: What % relative humidity was ensured with this system?**

Occasional in line RH measurements were conducted just downstream of the Nafion dryer that showed RH typically well below 30% RH. We have changed this sentence to read:

“The sample was then dried using a Permapure poly-tube Nafion dryer with low pressure sheath air to RH values below 30%, as verified by occasional in line checks using a handheld Extech Hygro-Thermometer.”

**Page 4, line 4 and 8: When and where were the calibrations performed?**

Five calibrations of the CCNc at each supersaturation setting were performed during four sessions throughout the cruise. These occurred near the beginning of the measurement period after recovery from a computer and power supply failure (15 Sep), while anchored at Puerto Princesa (20 Sep), after the last measurements while in transit back to Manila (27 Sep) (during which two full calibrations were conducted), and after arrival in Manila (29 Sep). Each session took two to five hours to complete, hence only four were conducted to limit measurement downtime. All CCNc supersaturation calibration discussion was moved to the methodology in section 2.1, as noted in the next comment.

CCN system flow rates were calculated with an in-line Gilibrator just before each CCNc supersaturation calibration session. The sentence describing this process has been amended to read:

“Flow rates used to calculate number concentrations were calibrated using a Gilibrator (Models 800285 & 800286) system, with in-line measurements conducted prior to each CCNc supersaturation calibration session as noted below.”

**Page 4, line 10: Can you comment on the stability of the supersaturation settings throughout the cruise?**

No significant trend was noted in the calibrations, which are noted to have supersaturation dependent calibration standard deviations of “0.14% ± 0.01, 0.38% ± 0.01, 0.52% ± 0.01, 0.71% ± 0.02, and 0.85% ± 0.03.” As noted in the previous comment, these are based on five

calibrations, as they took approximately two to five hours to complete. All supersaturation calibration discussion was moved to section 2.1 and now reads:

“Full calibration of the CCN system flow rates and supersaturations took two to five hours to complete, and was therefore conducted four times throughout the study on 15, 20, 27 and 29 September to limit measurement downtime. Each calibration session involved running a calibration scan at each CCNc temperature gradient setting (with two full scans conducted at each setting on 27 Sep) yielding a total of five calibrations per setting throughout the cruise. Calibrated supersaturation set-points and their respective standard deviations were  $0.14\% \pm 0.01$ ,  $0.38\% \pm 0.01$ ,  $0.52\% \pm 0.01$ ,  $0.71\% \pm 0.02$ , and  $0.85\% \pm 0.03$ , with no significant trend or calibration drift noted during the cruise.”

**Page 4, line 25: What was the temporal resolution of the filter samples? Are the analysis methods described in more detail in Reid et al., 2016? If so, the reference should be added to this sentence, too.**

Filter sample periods were between one and two and half days, and are described further by Reid et al., 2016. The sentence has been changed to:

“A series of PM<sub>2.5</sub> filters were collected by 5 lpm Minivol Tactical Air Samplers with sampling periods that varied between one and two and half days, and were analyzed for elemental concentrations by gravimetric, XRF, and ion chromatography methods, and organic and black carbon concentrations by the thermal-optical methods (Reid et al., 2016).”

**Page 5: please state the specific products used in this study (for example, where does the AOD mentioned in page 6, line 13, come from)?**

We have updated this section to include this information. The following sentence was added: “The MODIS Collection 6 MOD08 Level 3 daily Aerosol Optical Depth products were utilized for AOD measurements in the region, though cloud cover obscured measurements throughout much of the study.”

**Page 6, line 8: How were “surface winds” averaged, over what period or area?**

This information was added to the earlier initial description of the use of NOGAPS data in the methods section 2.2. The sentence now reads:

“Simulations from the Navy NOGAPS model were used to represent surface and 700 hPa winds, interpolated to one-degree spatial resolution and averaged over the study period, to provide an estimate of typical aerosol transport pathways (Hogan and Rosmond, 1991; Xian et al., 2013).”

**Page 6, line 16: Why was only this one density used - fire emissions were presumably not the only coarse aerosol type in the region?**

The purpose of this initial reconstruction was only to provide a general estimate of which periods had generally larger mass concentrations in order to provide a broad indication of how aerosol impacts changed throughout the study. Unit density or volume could provide similar indications, but the largest plumes associated with the largest mass concentrations were identified as smoke in an earlier study (Reid et al., 2016). As such, we opted to use a density consistent with smoke dominated aerosol to provide somewhat more realistic comparisons to NAAPS results. Overall, this section is only intended to provide an initial justification for the



reader that different aerosol population impacts are to be expected throughout the study. We have modified this section to indicate these are merely estimates as follows:

“Accumulation mode aerosol mass concentration estimates (Figure 1b) were derived from the PCASP measurements using a density of  $1.4 \mu\text{g m}^{-3}$  (Levin et al., 2010), assumed to be representative of a combination of smoldering peat and agricultural fire emissions typical in the MC (Reid et al., 2012) that constituted the largest plumes observed the study (Reid et al., 2016). Coincident model estimates generated by NAAPS along the ship track indicated generally similar results, with the highest mass concentrations occurring early and late in the measurement period, in general agreement with times during which backtrajectories passed over terrestrial sources and active fires”.

**Page 6, line 28-29: It would be helpful to label these locations in the map in Figure 1.**

Location names and anchorage times have been added to Figure 1. A copy of the updated figure along with additional changes can be found later in this document in a separate comment on Figure 1.

**Page 7, line 3: perhaps specify “biomass burning smoke”. Are there any filter analyses for this period?**

This change has been made in the new results section 3.2 section on the smoke type. The sentence has been clarified to discuss measurements used to attribute the measured aerosol to biomass burning smoke, and an additional sentence has been added indicating more attribution of this event to biomass burning was conducted in Reid et al., (2016). The section now reads: “Accumulation mode lognormal median diameters around 200 nm with a tail of smaller particles, elevated concentrations of carbon monoxide and benzene, as well as potassium in filter samples during this period (Reid et al., 2016, and Figure 2) were all consistent with expectations for aged biomass burning smoke (Yokelson et al., 2008; Akagi et al., 2011; Reid et al., 2015; Sakamoto et al., 2015). Additional examination and attribution of this event to biomass burning in Sumatra and Borneo is discussed further in Reid et al., (2016).”

**Page 9, line 7: it would be nice to see the tri-modal fit included in Figure 4**

An additional figure has been added as the new supplementary figure S1 that compares the two and three mode fits. The discussion of the ultrafine event type in the results section now references this figure as well.

## Ultrafine Event - Normalized $dN/d\log D_p$

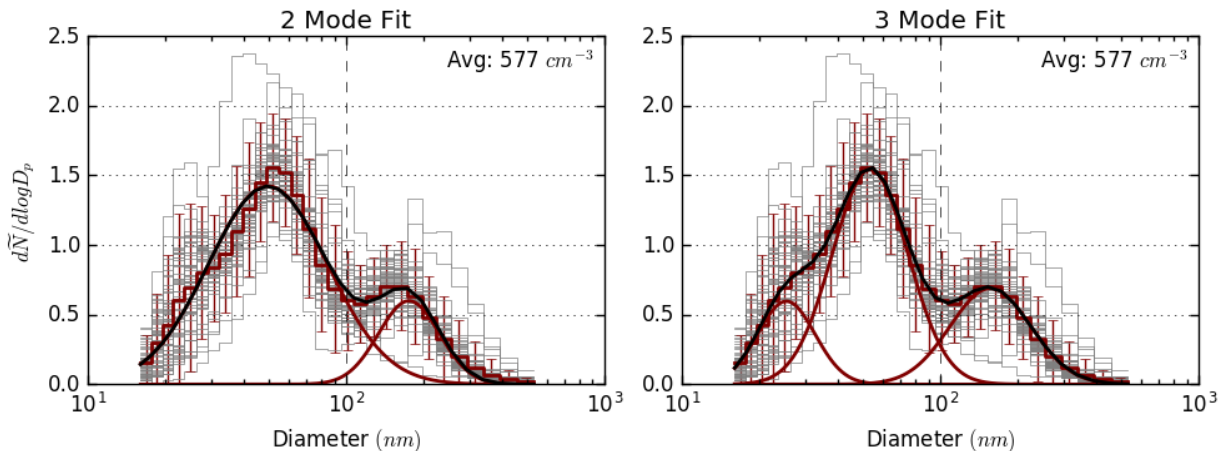

Supplemental Figure S1: The best fit of the Normalized  $dN/d\log D_p$  particle size distributions for the Ultrafine Event population type using two lognormal modes (left) and three lognormal modes (right). A three mode fit was indicated by the Hussein et al., (2005) algorithm for this population type, however for clustering purposes the two mode fit was used. Shown in these plots are the particle size distribution spectrum for each data point within the population (grey), the associated average bin values with error bars at 95% confidence interval (colored step lines;  $1.96 \times$  bin standard deviation), and best fit lognormal modes (colored curves) with multi-modal fit (black). The average particle number concentrations of data points within each population type are listed.

**Page 10, lines 23 – 33: This paragraph should be moved into the introduction. If a comparison of literature kappa values to this study's was intended, this comparison should be done more directly, rather than expecting the reader to jump back and forth between paragraphs.**

The background description of Kappa was intended primarily as a primer for the reader regarding interpretation of the hygroscopicity results. We have moved the literature comparison directly to the discussion section as noted in the response to the general discussion comment.

**Page 11, lines 23: -29: How can it be stated that the Aitken mode during the biomass burning period be derived from the background aerosol, when it is actually more hygroscopic than the Aitken mode of the marine background and precipitation clusters? Why would the biomass influence be confined to particles >100nm? (Surely not all biomass burning particles are primary?)**

It was not our intention to state the origin of Aitken size range particles in the tail of the distribution during the biomass burning smoke periods, for which there is not enough information to state with certainty. Rather, we intended to note that the difference in kappa values between Aitken and accumulation mode particles moved in opposing directions for smoke and marine population types. The increased kappa values for Aitken mode particles may be due to some combination of background marine Aitken particles, condensation or secondary formation of Aitken mode aerosol from higher hygroscopicity gas phase species co-emitted with the biomass burning, or similar effects from urban or anthropogenically influenced emissions along the transport pathway. Additionally, the Aitken mode hygroscopicity measurements were subject to higher uncertainties and varied more than the accumulation mode measurements.

We agree that the treatment of the hygroscopicity could therefore be clarified in the manuscript. We have removed much of the discussion of the possible causes of differences in hygroscopicity between population types from section 3.4 and re-focused the results section on presenting the population results. The discussion on hygroscopicity in section 4 has now been better constrained to note these points.

The updated discussion section has been discussed and copied in the earlier responses to the general comments. The updated results can be found in the marked-up version of the manuscript included at the end of this document.

**Language/typos:**

**Abstract, line 20: “aerosol population that” should be “aerosol population and”**

This change has been made.

**Page 2, line 31: “in situ” is not the right expression here, I believe. “In the area” or “in the SCS” would be better.**

We used in situ in this case primarily to contrast the measurements with remote sensing observations noted earlier in the introduction, which are both difficult to conduct and insufficient to properly characterize the region’s aerosol. We therefore would prefer to keep the “in situ” term in this sentence, but we have added “in the area” to the sentence to clarify this point. It now reads:

“These measurements represent the first in situ observations of size-resolved CCN properties in the area, and fill a gap in knowledge needed to assess aerosol-cloud-precipitation relationships in the in the data poor remote marine SCS region.”

**Page 4, line 15 and 16: choose one, “CCN activation spectrum” or “activated fraction spectrum”**

We have clarified these two terms as well as the quantities being measured and calculated to remove the confusing usage. This section has been rewritten as follows:

“The inversion yielded the dry ambient aerosol size distribution over the measured range ( $dN/d\log_{10}D_p$  for  $17 \leq D_p \leq 500$  nm) and the equivalent distribution of CCN particles activated at each supersaturation ( $dCCN/d\log_{10}D_p$ ). The activated fraction spectrum was then calculated as the fraction of total particles that formed droplets ( $CCN/CN$ ) at each diameter  $D_p$ . Each activated fraction spectrum was then fit using a three parameter fit similar to the approach of Rose et al. (2010).”

**Page 4, line 25: “that were analyzed” should be “and were analyzed”.**

This change has been made and sentence has been changed to:

“A series of PM<sub>2.5</sub> filters were collected by 5 lpm Minivol Tactical Air Samplers with sampling periods that varied between one and two and half days, and were analyzed for elemental concentrations by gravimetric, XRF, and ion chromatography methods, and organic and black carbon concentrations by the thermal-optical methods (Reid et al., 2016).”

**Page 4, line 14: A new sentence would be better than the hyphenation-clause combination: “number concentration). Two modes were identified as the best fit. . .”**

This change has been made.

**Page 4, line 16 and line 25: Start a new sentence instead of the hyphenation.**

These changes have been made.

**Page 4, line 22: “shortest” instead of “closest”?**

This does provide a better description. We have made the change.

**Page 8, line 31: Start a new sentence after “(Figure 2d)”.**

This change has been made.

**Page 11, line 12: “lower (. . .) than in the precipitation (. . .) populations”**

This section has been removed and the information moved to the results and discussion sections, and reworded to no longer include this sentence.

**Page 12, line 1: What does “from the entire study” mean?**

Hygroscopicity measurements during the organic event type were among the lowest measured during this study. This information has been moved to the new results section 3.2 for the organic event and now reads:

“Both Aitken and accumulation mode particles had among the lowest hygroscopicities measured during the cruise, with  $\kappa$  values around 0.2.”

**Figures/Tables:**

**Caption of figure 4: “each spectrum”**

This change has been made.

**Figure 1: The tick marks on the time axis would be easier to identify if they pointed outward**  
 We have changed Figure 1 based on comments to the following.

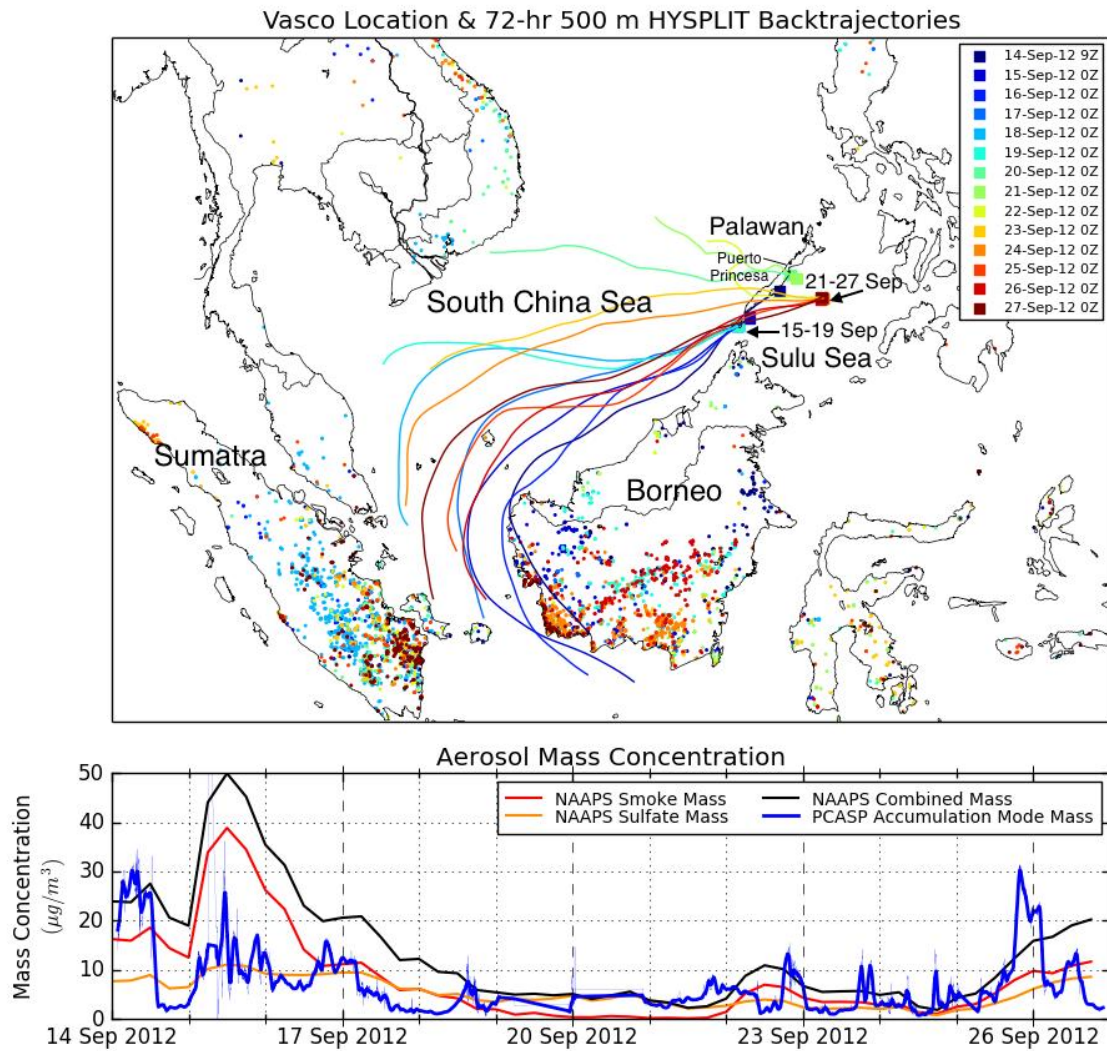

**Table 1: The font size is too small.**

We have included a rotated table in landscape orientation on the page, and will work with the publisher to ensure the new tables are better formatted for publication. If needed, we will split the table into several lines.

# Size-resolved aerosol and cloud condensation nuclei (CCN) properties in the remote marine South China Sea, Part 1: Observations and source classification

Samuel A. Atwood<sup>1</sup>, Jeffrey S. Reid<sup>2</sup>, Sonia M. Kreidenweis<sup>1</sup>, Donald R. Blake<sup>3</sup>, Hafliði H. Jonsson<sup>4</sup>,  
5 Nofel D. Lagrosas<sup>5</sup>, Peng Lynch<sup>6</sup>, Elizabeth A. Reid<sup>2</sup>, Walter R. Sessions<sup>6,7</sup>, James B. Simpas<sup>5</sup>

<sup>1</sup>Department of Atmospheric Science, Colorado State University, Ft. Collins, CO

<sup>2</sup>Marine Meteorology Division, Naval Research Laboratory, Monterey, CA

<sup>3</sup>Department of Chemistry, University of California, Irvine, CA

<sup>4</sup>Department of Meteorology, Naval Postgraduate School, Monterey, CA

10 <sup>5</sup>Manila Observatory, Manila, Philippines

<sup>6</sup>CSC Inc. at Naval Research Laboratory, Monterey, CA

<sup>7</sup>Space Sciences Engineering Center, University of Wisconsin, Madison, WI

*Correspondence to:* Jeffrey S. Reid (jeffrey.reid@nrlmry.navy.mil)

**Abstract.** Ship-based measurements of aerosol and cloud condensation nuclei (CCN) properties are presented for two weeks  
15 of observations in remote marine regions of the South China Sea/East Sea during the Southwestern Monsoon (SWM) season. Smoke from extensive biomass burning throughout the Maritime Continent advected into this region during the SWM, where it was mixed with anthropogenic continental pollution and emissions from heavy shipping activities. Eight aerosol types were identified using a K-Means cluster analysis with data from a size-resolved CCN characterization system. Interpretation of the clusters was supplemented by additional onboard aerosol and meteorological measurements, ~~and~~  
20 satellite, and model products for the region. A typical bimodal marine boundary layer background aerosol population was identified and ~~that was~~ observed mixing with accumulation mode aerosol from other sources, primarily smoke from fires in Borneo and Sumatra. Hygroscopicity was assessed using the  $\kappa$  parameter and was found to average 0.40 for samples dominated by aged, accumulation mode smoke; 0.65 for accumulation mode marine aerosol; 0.60 in an anthropogenic aerosol plume; and 0.22 during a short period that was characterized by elevated levels of volatile organic compounds not  
25 associated with biomass burning impacts. As a special subset of the background marine aerosol, clean air masses substantially scrubbed of particles were observed following heavy precipitation or the passage of squall lines, with changes in observed aerosol properties occurring on the order of minutes. Average CN number concentrations, size distributions, and  $\kappa$  values are reported for each population type, along with CCN number concentrations for particles that activated at supersaturations between 0.14% and 0.85%.

30

**Keywords.** Remote Marine Aerosol, Cloud Condensation Nuclei, Biomass Burning, South China Sea, Source Apportionment, K-Means, Mixing State

## 1 Introduction

In the Southeast Asian Maritime Continent (MC) and South China Sea/East Sea (SCS) aerosol particles are expected to play an important role modulating cloud development, precipitation, and radiative properties that affect heat transfer through the atmosphere (Reid et al., 2013). Assessment of regional aerosol properties important to understanding such processes in

5 the remote marine segments of this Southeast Asian Maritime Continent (MC) and South China Sea/East Sea (SCS) regions has proven difficult. Extensive cloud cover confounds remote sensing and leads to a clear sky bias in observations (Feng and Christopher, 2013; Reid et al., 2013). Aerosol monitoring has largely been confined to urban centers that are often dominated by local emissions, while in-situ sampling in remote areas has been limited in duration and scope (Irwin et al., 2011; Robinson et al., 2011; Lin et al., 2014; Reid et al., 2015). Airborne measurements have provided some representation of  
10 aerosol over wider regions and at various levels (Hewitt et al., 2010; Robinson et al., 2012), but additional questions regarding the ~~impact of various sources on surface aerosol concentrations and the~~ representativeness of such point measurements results across larger time scales remain. Similarly, the impact of various aerosol sources on surface properties and concentrations in remote marine regions, and their relationship to expected transport pathways and the few remotely sensed column measurements that exist is not well understood. Thus, over these remote ocean regions the aerosol optical and

15 physical properties, their variability in time and space, and the processes controlling aerosol lifecycle have not been well constrained. This uncertainty in the aerosol environment itself comes in addition to uncertainty about its impacts on meteorological processes. Aerosol concentration has been found to relate to cloud development, cloud microphysics, and precipitation formation in the region (Yu et al., 2008; Yuan et al., 2011; Wang et al., 2013), while smoke may affect cloud droplet size distributions and the onset of precipitation, similar to processes observed in other tropical regions impacted by  
20 biomass burning (Rosenfeld, 1999; Andreae et al., 2004). Improved knowledge of the aerosol environment and aerosol-cloud-climate relationships in the Southeast Asian region has therefore been identified as important regionally, and in regards to links with global climate and large-scale aerosol budgets (Reid et al., 2013).

During the May through October Southwestern Monsoon (SWM) season, burning throughout the MC typically reaches its greatest extent between August and early October as precipitation associated with the ITCZ shifts north into Indochina (Reid  
25 et al., 2012). The resulting heavy smoke mixes with urban, industrial, marine, and shipping emissions in an exceedingly complex aerosol mixture (Balasubramanian et al., 2003; Atwood et al., 2013; Reid et al., 2013). During this period, aerosol particles from surface sources are generally advected by low level mean winds throughout the SCS, where they are scavenged by precipitation or eventually removed in the monsoonal trough east of the Philippines (Reid et al., 2012, 2015; Wang et al., 2013; Xian et al., 2013). As a result, the region of the SCS and Sulu Sea to the north and east of Borneo has  
30 been predicted to be a receptor for much of these biomass burning and pollution emissions from the greater MC during periods when air masses enter more convective phases of the SWM (Reid et al., 2012; Xian et al., 2013).

Two research cruises in this area were conducted during the 2011 and 2012 SWM to take advantage of these conditions and perform in-situ aerosol and meteorological measurements in the remote marine boundary layer (MBL) in the SCS and Sulu

Sea (Reid et al., 2015, 2016). In this paper, we present observations of aerosol and CCN characteristics during the second cruise, and their relationship to aerosol source type, air mass, and meteorological phenomena. These measurements represent the first in situ observations of size-resolved CCN properties [in the area](#), and fill a gap in knowledge needed to assess aerosol-cloud-precipitation relationships in the in the data poor remote marine SCS region.

## 5 2 Methods and Cruise Description

The SCS research cruises occurred during the month of September in both 2011 and 2012, and took place aboard the 35m, 186 ton *M/Y Vasco*, operated out of Manila by Cosmix Underwater Research Ltd. A thorough description of the vessel and instrumentation for the 2011 and 2012 cruises can be found in Reid et al. (2015) and Reid et al. (2016), respectively. Here we are concerned with the 2012 cruise, which departed Manila on 4 September from Navotas, Manila Bay, and returned on 29 September. The sampling strategy for these cruises involved moving between various anchorages in the SCS and Sulu Sea around the Palawan Archipelago. Sampling occurred throughout the cruise, but aerosol measurements were shut down [or invalidated and removed from the dataset](#) during periods when representative sampling could not be achieved (i.e., [measured relative wind not from over the ship bow, leading to potential self-sampling; incompatible mean winds and ship orientation; see self-sampling; see Reid et al., \(2016\) for more details](#)). Remaining periods of self-sampling of ship emissions were identified by anomalous size distributions and high particle number concentrations, and were removed from the data set before analysis. The size-resolved CCN system (Petters et al., 2009) that provided the bulk of the measurements reported here had a computer failure that, once fixed, limited reliable measurements to primarily the last two weeks of the cruise, hence we focus here on data from 14-26 September 2012. This period included several transits along the east side of Palawan Island, stationary measurements at an anchorage between Palawan and Borneo (7.86N, 116.94E), and two anchorages at Tubbataha Reef in the middle of the Sulu Sea (8.80N, 119.26E).

~~The NOAA Hybrid Single Particle Lagrangian Integrated Trajectory (HYSPPLIT) Version 4.9 model (Draxler et al., 1999; Draxler and Hess, 1997, 1998) was used to generate daily 72-hour backtrajectories from the *Vasco* location with arrival heights of 500m to indicate likely boundary layer transport patterns. The GDAS1, 1° x 1° HYSPPLIT meteorological dataset was used to drive the model.~~

### 25 2.1 Aerosol Measurements

A DMT [Passive Cavity Aerosol Spectrometer Probe \(PCASP\) X2](#) configured in an aviation pod with heated inlet was mounted at the *Vasco* top mast [approximately 10 m above the water surface](#) to provide optical measurements of dry particle size distributions between approximately 125 nm and 3  $\mu\text{m}$ . Additional aerosol instrumentation was located in a forward locker, below and slightly behind the aerosol inlet. Sampled air was fed to the locker via a 3 cm diameter, 4 m long inlet located next to the PCASP. Although the inlet was not aspirated, several high flow rate nephelometers sampling from the inlet ensured low residence time in the sample line. Further details and additional instrumentation are discussed in Reid et al.



(2016). A size resolved CCN system sampled air from the inlet just inside the instrument locker with an approximately 2 m, 0.635 cm diameter copper tube. A URG cyclone with an approximate 1  $\mu\text{m}$  50% size cut was used to remove the largest particles from this CCN sampling line, including coarse mode sea-salt, to minimize wear and corrosion on downstream components. The sample was then dried using a Permapure poly-tube Nafion dryer with low pressure sheath air [to RH values below 30%, as verified by occasional in line checks using a handheld Extech Hygro-Thermometer](#).

Approximately 1.1 liters per minute (lpm) were drawn through the size resolved CCN system, which was comprised of an x-ray neutralizer (TSI Model 3087) and a TSI 3080 Electrostatic Classifier with a long DMA column (TSI Model 3081) for quasi-mono-disperse particle sizing, preceded by a 0.071 cm orifice (0.69  $\mu\text{m}$  50% cutpoint diameter) impactor. The DMA was operated with a sheath flow rate of 5 lpm (liters per minute) and sample flow rate of 1.1 lpm. The sample flow was then split between a TSI 3782 Water Condensation Particle Counter (CPC) with a flow rate of 0.6 lpm, and a DMT Cloud Condensation Nuclei Counter (CCNc) with a flow rate of 0.5 lpm. Flow rates used to calculate number concentrations were calibrated using a Gilibrator (Models 800285 & 800286) system, [with in-line measurements conducted prior to each CCNc supersaturation calibration session as noted below](#).

The size-resolved CCN system measured CN and CCN (activated particles at a CCNc set-point supersaturation) concentrations in each of 30 quasi-mono-disperse size bins between 17 nm and 500 nm. The CCNc was operated at five temperature gradient settings and calibrated using ammonium sulfate (following the methods described by Petters et al. (2009)) to measure the corresponding maximum environmental supersaturation within the CCNc column. ~~Calibrated supersaturation set points and their respective standard deviations were 0.14%  $\pm$  0.01, 0.38%  $\pm$  0.01, 0.52%  $\pm$  0.01, 0.71%  $\pm$  0.02, and 0.85%  $\pm$  0.03.~~ The scan of all 30 size bins at each supersaturation took approximately 15 minutes, while a complete measurement over all 5 supersaturation settings took approximately two hours due to pauses between settings while column temperatures stabilized. The measured CN and CCN particle counts were inverted using the methodology of Petters et al. (2009). The inversion yielded the dry ambient aerosol size distribution over the measured range ( $dN/d\log_{10}D_p$  for  $17 \leq D_p \leq 500$  nm) and ~~the equivalent distribution of CCN particles activated~~ [activation spectra at at each supersaturation \( \$dCCN/d\log\_{10}D\_p\$ \).](#) ~~The activated fraction spectrum was then calculated~~ [expressed](#) as the fraction of total particles [that formed droplets \(CCN/CN\) at each diameter  \$D\_p\$  that formed droplets](#). Each activated fraction spectrum was [then](#) fit using a three parameter fit similar to the approach of Rose et al. (2010). The diameter at which 50% of particles in the fit had activated ( $D_{50}$ ) was used to calculate the associated hygroscopicity parameter,  $\kappa$  (Petters and Kreidenweis, 2007). [Full calibration of the CCN system flow rates and supersaturations took two to five hours to complete, and was therefore conducted four times throughout the study on 15, 20, 27 and 29 September to limit measurement downtime. Each calibration session involved running a calibration scan at each CCNc temperature gradient setting \(with two full scans conducted at each setting on 27 Sep\) yielding a total of five calibrations per setting throughout the cruise. Calibrated supersaturation set-points and their respective standard deviations were 0.14%  \$\pm\$  0.01, 0.38%  \$\pm\$  0.01, 0.52%  \$\pm\$  0.01, 0.71%  \$\pm\$  0.02, and 0.85%  \$\pm\$  0.03, with no significant trend or calibration drift noted during the cruise. The measured range of 0.14% to 0.85% supersaturation was](#)

selected based on values that could both be reliably measured by the CCNc instrument and represented supersaturations expected in the region where aerosol effects may be relevant, ranging from marine stratocumulus with peak supersaturations often below 0.2% to highly convective clouds with supersaturations above 1% (Reutter et al., 2009; Ward et al., 2010; Tao et al., 2012).

5 As the SCS environment tended to have relatively few particles smaller than 50 nm, only the measurements at the 0.14% and 0.38% supersaturation settings had complete activation curves that spanned the measured particle diameter range. For the higher supersaturation settings, the  $D_{50}$  diameter tended to occur at small diameters with low CN and CCN concentrations, thereby increasing uncertainty in the associated  $\kappa$  values. As a result,  $\kappa$  values were only reported for the 0.14% and 0.38% supersaturation settings. In addition, rather than continuously running a full two-2-hour scan across all supersaturation  
10 settings, individual scans (approximately 15 minutes) were run more often for the 0.14% and 0.38% settings to take advantage of this outcome. The range of  $\kappa$  values measured for the particles active at supersaturations of 0.14% and 0.38% was typically between about 0.3 and 0.8, although the full range was between 0.2 and 1.1 (Figures 2e, f). The  $D_{50}$  diameters for these hygroscopicity values spanned approximately 96 to 150 nm ( $\kappa$  range: 0.8 – 0.2) for the 0.14% supersaturation setting, and 45 to 80 nm ( $\kappa$  range: 1.1 – 0.2) for the 0.38% setting. The hygroscopicity measurements were therefore more  
15 indicative of accumulation mode hygroscopicity during the 0.14% scans and Aitken mode hygroscopicity during those at 0.38%. Additionally, particles outside these size ranges were not well quantified by these measurements.~~conducted~~

## 2.2 Ancillary Measurements and Products

Additional measurements of aerosol composition were used to validate identified source types impacting the measurements throughout the cruise. A series of  $PM_{2.5}$  filters were collected by 5 lpm Minivol Tactical Air Samplers with sampling periods  
20 that varied between one and two and half days, and ~~werethat were~~ analyzed for elemental concentrations by gravimetric, XRF, and ion chromatography methods, and organic and black carbon concentrations by the thermal-optical methods (Reid et al., 2016). Trace gas concentrations were measured intermittently throughout the cruise by whole-air gas samples for gas chromatography analysis, as discussed further in Reid et al. (2016).

A suite of weather monitoring instruments was located on a 3m bow mast to provide coincident meteorological measurements throughout the study. From this suite, wind speed and wind direction measurements from a Campbell sonic anemometer were used to identify gust front passage. An OTT Parsivel disdrometer was utilized to measure precipitation, from which only the rain rate measurements were used in this analysis.

Several remote sensing and model products were used to characterize the wider SCS atmospheric environment and to identify potential aerosol sources. MODIS visible and IR products were used to identify convection and squall line  
30 propagation across the SCS. The MODIS Collection 6 MOD08 Level 3 daily Aerosol Optical Depth products were utilized for AOD measurements in the region, though cloud cover obscured measurements throughout much of the study. MODIS active fire hotspot analysis and the FLAMBE smoke flux product from Terra and Aqua were used to identify the locations and times during which fires were burning in the MC (Giglio et al., 2003; Reid et al., 2009; Hyer et al., 2013). Simulations

from the Navy NOGAPS model were used to represent surface and 700 hPa winds, interpolated to one-degree spatial resolution and averaged over the study period, to provide an estimate of typical~~and thereby estimate likely~~ aerosol transport pathways ~~throughout the study~~ (Hogan and Rosmond, 1991; Xian et al., 2013)~~(Hogan and Rosmond, 1991)~~. Finally, the Navy Aerosol Analysis and Prediction System (NAAPS) was used to predict smoke and sulfate aerosol mass concentrations at the surface along the *Vasco* ship track (Lynch et al., 2016).

The NOAA Hybrid Single Particle Lagrangian Integrated Trajectory (HYSPPLIT) Version 4.9 model (Draxler et al., 1999; Draxler and Hess, 1997, 1998) was used to generate daily 72-hour backtrajectories (spawned at 0Z, 8 AM local) from the *Vasco* location with arrival heights of 500m to indicate likely marine boundary layer transport patterns. The GDAS1, 1° x 1° HYSPPLIT meteorological dataset was used to drive the model. Trajectory paths were found to be largely influenced by synoptic scale changes in the regional meteorological state of the atmosphere, with no substantial differences due to arrival time of day. Arrival heights between 100 m and 3000 m were examined. Trajectories with arrival heights below 1000 m were generally consistent and representative of boundary layer transport (Atwood et al., 2013; Xian et al., 2013), while higher heights tended to be increasingly influenced by free troposphere transport pathways with a more westerly component. As such, 500 m was selected to be representative of general shifts in synoptic scale boundary layer transport pathways, though more complex vertical interactions and mixing from aloft are a potential influence in the region (Atwood et al., 2013). Trajectory lengths of 72 hours were found to be sufficient to demonstrate general transport path differences between ocean dominated regions of the central portion of the SCS and more terrestrially influenced regions that passed closer to Borneo and Sumatra.

### 2.3 Aerosol Population Type Classification

The  $dN/d\log_{10}D_p$  dry particle size distributions obtained every 15 minutes from the CCN system were first normalized by the particle number concentration summed over all bins. Each of these normalized size distributions was then parameterized by fitting a lognormal mixture distribution using an algorithm based on Hussein et al., (2005). This algorithm fit each distribution to one, two, or three lognormal modes, each ~~described~~defined by three lognormal distribution parameters (median diameter, geometric standard deviation, and fractional number concentration)~~—which identified a best fit using t~~. Two modes were identified as the best fit for 690 of 731 data points in this dataset. In order to have a common point of comparison for classification purposes ~~the a~~ two mode ~~best~~-fit was used for all data points, yielding a parameterized Aitken and accumulation mode for each 15-minute data point. ~~— d~~Data points for which the fitting algorithm selected an additional third mode are noted in the clustering results in Sect. 4.3 and the Supplementary Figure S1.

These normalized size distribution parameters were then combined with hygroscopicity and total number concentration measurements to serve as input variables for an unsupervised cluster analysis (parameters given in Table 1). As hygroscopicity data was available for at most one mode (during the 0.14% or 0.38% supersaturation scans), Aitken and accumulation mode hygroscopicity was treated as missing for data points without this information. In order to account for missing data and adjust all clustering variables to the same scale, each variable was first standardized to a mean of zero and

standard deviation of one, with missing data points given imputed to a value a zero (the mean value). As a result, the clustering distance function was insensitive to missing data, but still included information on hygroscopicity when available.

A hierarchical cluster analysis was first conducted using the *cluster.AgglomerativeClustering* class of the Python scikit-learn package (Pedregosa et al., 2011) using the Ward linkage to help ascertain the number of clusters that can be found in the dataset. Each step in this process involved merging two data points or clusters into a new cluster based on those points with the closest-shortest distance between normalized input measurements (Karl Pearson distance function). A dendrogram and associated measure of the distance between merged clusters for each subsequent clustering step was used to identify potential numbers of clusters appropriate for the dataset. The distance between merged clusters increases at steps that merge substantially different clusters (Wilks, 2011)—in this case indicating 5, 8, 9, and 12 clusters as potentially appropriate for this data set.

A nonhierarchical K-Means cluster analysis was then conducted for each of these four potential cluster numbers using the scikit-learn *cluster.KMeans* class to refine the cluster members. The appropriate number of clusters was selected to classify the dataset according to was identified based on the K-Means result with the least number of clusters that maintained physically distinct and temporally consistent aerosol populations for the associated clusters. In particular, as the timestamp of a data point was not included in the cluster analysis, clusters with smaller numbers of data points were considered distinct if they all occurred during a narrow time frame that could be associated with a transient atmospheric phenomenon. The time frames of all clusters were then compared against other aerosol and meteorological observations to ensure they were physically meaningful. The result was a set of eight identified aerosol population types with associated time periods corresponding to the 15 minute CCN system data points. Finally, size distribution and hygroscopicity measurements were averaged for all time periods associated with each population type.

### 3 Results

#### 3.1 Overview of Study

The daily positions of the *Vasco* during the two weeks in September 2012 that comprise this study are shown in Figure 1a, together with HYSPLIT 72-hour backtrajectories initiated within the MBL. Several extended periods at the same anchorage are noted by the range of dates spent at these locations. The daily fire hot spots are also indicated in this figure. Average NOGAPS surface winds in the boundary layer were from the southwest, often advecting air parcels from near Borneo, while lower free tropospheric winds, such as those at 700 hPa, were more westerly due to the generally veering structure of the lower atmosphere in the SCS (Reid et al., 2016). Fires detected by MODIS occurred throughout much of Borneo and Southern Sumatra during the study, with surface-level trajectories near the start and near the end of the study period passing close to active fires, whereas those during the middle period remained primarily over open ocean. Results from the NAAPS model, along with limited satellite AOD measurements not obscured by clouds during this period, confirmed this general smoke transport pathway. Accumulation mode aerosol mass concentration estimates (Figure 1b) were initially derived

generated from the PCASP measurements using a density of  $1.4 \mu\text{g m}^{-3}$  (Levin et al., 2010), assumed to be representative of a combination of smoldering peat and agricultural fire emissions typical in the MC (Reid et al., 2012) that constituted the largest plumes observed during the study (Reid et al., 2016). Coincident model estimates generated by NAAPS along the ship track indicated generally similar results, with the highest mass concentrations occurring ~~Mass concentrations were highest~~ early and late in the measurement period, in general agreement with ~~times during which the~~ backtrajectories ~~passing passed~~ over terrestrial sources and active fires, ~~and with NAAPS modeled surface aerosol smoke and sulfate concentrations (Figure 1b)~~. Air parcels advecting into the SCS and Sulu Sea during this period that originated from areas further to the north and west were cleaner than those from other sectors, due to fewer emission sources and more precipitation along the trajectories. Changes in the observed particle concentrations also occurred on timescales shorter than these weekly large-scale variations, as shown in the aerosol observation timelines in Figures 2a-c. Many of these higher-frequency fluctuations were associated with squall line passages and heavy local precipitation, as discussed further ~~below in the following section~~. The timeline of  $dN/d\log D_p$  size distributions, as measured by the CCN system and shown in Figure 2a, indicates that most of the particle number concentration fell within the 17-500 nm measurement range, except possibly during the highest-concentration periods. A more extensive comparison of model and satellite measurement in situ observations is discussed in Reid et al. (2016).

### **3.2 Analysis of Daily Observations**

~~At the start of the measurement period on 14 Sept., the Vasco was in transit south from Puerto Princessa, Philippines, in the middle of the island towards Balabac Island at the southern edge of Palawan Archipelago. HYSPLIT 500 m backtrajectories on this day identified MBL transport from the southwest over burning regions in Borneo (Figure 1a). As shown in Figure 2,~~ at the start of the campaign, high number concentrations of accumulation mode particles ( $1500$  to  $4000 \text{ cm}^{-3}$ ) with generally mono-modal size distributions were observed (best fit lognormal median diameters around 200 nm), consistent with expectations for aged smoke. Elevated concentrations of potassium, carbon monoxide, and benzene during this period (Reid et al., 2016, and Figure 2e) all reinforce the classification of this aerosol as smoke (Yokelson et al., 2008; Akagi et al., 2011; Reid et al., 2015). This initial smoke impacted period was followed by a drop in particle number concentrations after 12Z on 14 Sept. as a squall line passed over the Vasco and left a clean air mass scrubbed of many of the particles. Total particle number concentrations were among the lowest values observed during the cruise, with fewer than  $200 \text{ cm}^{-3}$  measured in the 17-500 nm range. Particle number concentrations did not recover for approximately 10 hours, at which point the aerosol size spectra and concentrations resembled those measured in the air mass before the gust front passage.

The Vasco remained at the same anchorage at Balabac Island on the southern tip of the Palawan Archipelago until 19 Sept. Beginning at about 5Z on 17 Sept., particle number concentrations dropped, but not as low nor as rapidly as during the post-squall line event. A distinct bimodal size distribution was observed that coincided with the onset of precipitation observed at the boat (Figure 2d). Satellite visible and IR imagery (not shown) indicated that no long lived squall line was associated with this 17 Sept. precipitation event. Beginning around 18Z on 17 Sept. number concentrations began to increase and a third

mode of particles with diameters between 20 and 30 nm was observed (Figure 2a). This mode slowly mixed into the Aitken mode as more typical bimodal distributions resumed by the middle of 18 Sept. A filter during this period showed very low potassium concentrations, with benzene among the lowest values measured during the study, indicating that biomass burning was not the likely source for this event. In addition, at the start of this period several volatile organic compound species (VOCs) were elevated as compared to periods before and after the event. Anthropogenic, shipping, and marine and terrestrial biogenic emissions are known sources of such compounds; isoprene, a common biogenic VOC, was not observed during this event, and a brief period of elevated dimethyl sulfide, associated with marine emissions from phytoplankton, was observed shortly before but not during this event (Reid et al., 2016).

The data gap on 19 Sept occurred during the return transit to Puerto Princesa, as the trailing winds caused self-sampling of boat emissions. However, westerly winds allowed for sampling once the *Vasco* turned to head into port, and measurements were continued for several hours to characterize emissions from the port and the city with a population of over 200,000. Number concentrations in port were considerably higher than in the remote marine locations of the SCS, with total number concentrations between 4000 and 10,000  $\text{cm}^{-3}$  in the 17–500 nm size range. Ultrafine particles ( $D_p < 100$  nm) dominated number concentrations during this period, although large number concentrations of accumulation mode particles with diameters between 100 and 300 nm were also observed.

The *Vasco* departed the port and sailed on an east-southeasterly course late on 20 Sept., during a period when both NOGAPS and the onboard weather tower indicated generally westerly low-level winds. This wind direction allowed for measurements of the Puerto Princesa urban plume as it was transported out over the Sulu Sea. Particle number concentrations between roughly 750 and 2000  $\text{cm}^{-3}$  were measured during this period, with size spectra showing a mode with 80–90 nm median diameters. This modal median diameter was unique during the cruise; modal median diameters in the 40–70 nm or 150–225 nm ranges were more commonly observed. As the *Vasco* moved further to the southeast and out of the city plume, the size distribution measurements began to more closely resemble the previously seen bimodal background marine conditions.

The *Vasco* arrived at the remote Tubbataha reef in the middle of the Sulu Sea on 21 Sept and remained there through the end of the measurement period on 27 Sept. Throughout this time, the inflow arm of a nearby tropical cyclone spawned large amounts of intermittent convection and cloud cover over much of the SCS and Borneo. Measured number concentrations and size distributions showed considerable variation during this period as transport of smoke from Borneo was intermixed with cleaner periods associated with precipitation events. A final larger smoke event occurred on 25 and 26 Sept shortly before the end of the measurement period. This event was similar to the early smoke-dominated period with largely mono-modal size distributions and total particle number concentrations above 2000  $\text{cm}^{-3}$ , and was followed by mixing and a return to background marine conditions.

### 3.3.2 Aerosol Population Type Classification and Properties

The cluster analysis was first conducted to investigate potential aerosol population types in the dataset, followed by physical interpretation of the results against cluster aerosol properties, coincident measurements, and meteorological conditions. The parameter values input to the cluster analysis are shown for each data point and variable in Figure 3, and colored by cluster number for the results of the eight-cluster K-Means analysis. The average value and intra-cluster standard deviation for each cluster parameter and cluster are given in Table 1. Normalized size distributions for each of these eight aerosol populations are shown in Figure 4; the average CN and CCN number concentrations and hygroscopicities are given in Table 2. Equivalent normalized volume distributions are shown in Supplementary Figure S1S2. The cluster number associated with each measurement is similarly shown as the background color in Figure 2 and marker color in Figure 5. The aerosol properties, meteorological conditions, and likely transport pathways associated with data points in each cluster were then used to provide a physical interpretation of the results and a name identifying the likely source of each population type on the basis of its likely sources as discussed below. A name identifying the likely source of each population type on the basis of its likely sources as discussed below was then assigned as follows, on the basis of the previously identified meteorological and other factors discussed in Sect. 3.2. Clusters 1-4 were the most commonly found (representing 85% of the total observations, Table 2), while clusters 5-8 represented special cases, generally of short duration, that could be identified with by specific locations or sampling conditions.

1. Background Marine: Data points associated with this cluster occurred throughout the study, typically following rain in the vicinity of the Vasco or transport from areas further removed from terrestrial regions. In addition, this type was observed following shortly after periods associated with each of the other identified clusters, often appearing as a transition between other types (Figure 2). The measured properties of this population type were similar to the background marine aerosol reported in many prior studies (e.g. Hoppel et al., 1994; O'Dowd et al., 1997; Spracklen et al., 2007; Good et al., 2010). The population featured a bimodal size distribution with a Hoppel minimum near 90 nm, thought to be due to cloud or fog processing of marine aerosol (Hoppel et al., 1986) near 90 nm due to cloud or fog processing. The inner quartile range (IQR: middle 50% of observations between the 25%–75% percentiles) of number concentrations ranged from 382 to 623 cm<sup>-3</sup>, with on average 42% of the total number concentration residing in the accumulation mode as specified by the bimodal fit. Modal hygroscopicities were found to average 0.65 for the accumulation mode and 0.46 for the smaller Aitken mode, while activated fractions were generally moderate across the range of measured supersaturations as compared to other identified population types (Table 1). Each of these findings further reinforced the classification of this cluster as a typical background marine aerosol.
2. Precipitation: This distribution was found during periods immediately following extensive precipitation at or near the Vasco (Figure 2d). Air masses had been substantially scrubbed of particles and where accumulation mode particles had been preferentially removed. While the number concentrations of large-mode particles were lower than those in the background marine periods, the number concentrations of smaller particles, particularly



those below 40-50 nm, were comparable to the clean-background marine type. The longest contiguous period of this type occurred on 14 Sept. immediately following the passage of a squall line observed in the satellite visible and IR products (not shown) that left a clean air mass with fewer than 200 cm<sup>-3</sup> measured in the 17-500 nm range in its wake. ~~Identified periods were nearly always associated with precipitation at or near the Vasco (Figure 2d), and~~ Extended periods of this type occurred in the wake of the squall lines, though not all instances of nearby precipitation lead to this type. Number concentrations tended to be lower than the clean-background marine type with an IQR from 227 to 441 cm<sup>-3</sup>. Hygroscopicities were similarly lower than the background marine population with  $\kappa$  values of 0.54 and 0.34 for the accumulation and Aitken modes, respectively. Total CCN concentrations across all supersaturations were found to be lower than in background marine air masses due to the combination of fewer total particles, generally smaller particle sizes, and lower hygroscopicities.

3. Smoke: Data points associated with this aerosol type, particles occurred primarily in two events on 14 Sept. and 25-26 Sept., during which backtrajectories were at their furthest south, near burning regions in Borneo (Figure 1a). Normalized size distributions indicated that particles were largely concentrated in a single accumulation mode with a tail of smaller particles. This type was associated with the highest total particle number and estimated submicron mass concentrations observed during the cruise, with the exception of measurements taken in the urban plume of Puerto Princessa. The standard deviations in the normalized size distribution parameters for the dominant accumulation mode in this population in (Figure 4, Table 1) were small, even while number concentration varied widely (IQR 1802 to 2780 cm<sup>-3</sup>; 81% accumulation modal fraction). Accumulation mode hygroscopicities were lower than either the background marine or precipitation types, with average  $\kappa$  values of 0.40. Aitken mode hygroscopicities showed the opposite behavior from the first two population types with higher  $\kappa$  values of 0.54, though the measured uncertainties (Figure 2 e&f) and standard deviations were considerably higher than for the accumulation mode (0.25 and 0.03, respectively). Interestingly, activated fractions were highest among all population types across the full range of measured supersaturations, owing to the large number fraction of particles in the accumulation mode, while CCN concentrations were the highest of all types (except those measured in port) due primarily to the larger total particle number concentration in these smoke plumes.

3- Accumulation mode lognormal median diameters around 200 nm with a tail of smaller particles, elevated concentrations of carbon monoxide and benzene, as well as potassium in filter samples during this period (Reid et al., 2016, and Figure 2c) were all consistent with expectations for aged biomass burning smoke (Yokelson et al., 2008; Akagi et al., 2011; Reid et al., 2015; Sakamoto et al., 2015). Additional examination and attribution of this event to biomass burning in Sumatra and Borneo is discussed further in Reid et al., (2016). Finally, while smoke is considered the dominant aerosol source during these periods, anthropogenic pollution may still have been emitted along the transport path and contributed to measured results.

4. Mixed Marine: This population was characterized as-by periods when-during which the background marine type was mixing-mixed with other sources of aerosol. Most of the data points associated with this type had transport



pathways and biomass burning sources similar to those for the smoke population type, but with number concentrations and size distribution parameters, and hygroscopicities between those of the clean background marine and smoke types (IQR 782 to 1160  $\text{cm}^{-3}$ ; 68% accumulation modal fraction), indicating there was insufficient smoke for it to dominate the properties of the marine background. Accumulation and Aitken mode hygroscopicities of 0.48 and 0.54, along with activated fractions and CCN concentrations, were similarly indicative of mixing between smoke and background marine sources.

4- While periods of smoke mixing with a background marine air mass appeared to constitute the majority of data points in this cluster, several other periods point to other phenomena of interest being included in this type, perhaps indicating this cluster was relatively more complex than other population types. Short lived intrusions (two to five hours) of accumulation mode particles were regularly observed in both the CCN system and PCASP datasets (e.g. 18-23Z on 22, 23, and 24 Sep) after which the size distributions quickly returned to background marine conditions. These excursions were largely constrained to the pre-dawn hours (sunrise occurs around 22Z) when the boundary layer was thinnest, and when precipitation was occurring in the vicinity of the Vasco. Several prior studies have shown that smoke and anthropogenic pollution aerosol within the wider MC region can be lofted into and transported in the lower free troposphere (Tosca et al., 2011; Robinson et al., 2012; Zender et al., 2012; Campbell et al., 2013; Atwood et al., 2013). The influence of a free tropospheric aerosol layer as a source of MBL aerosol and CCN has been identified in other remote oceanic regions as well (Clarke et al., 2013). One possible explanation for these events (and possibly for the observed organic and ultrafine events that were characterized by increases in gas phase VOCs as noted in the next clusters) is therefore that aerosol may have been mixed down into the MBL from a layer aloft, perhaps on the edge of rain shafts. Alternatively, they may also be due to intermittent plumes of aerosol that survived stochastic precipitation removal events along a boundary layer transport pathway or human terrestrial activities in the pre-dawn hours. In addition, ~~A~~air masses influenced by anthropogenic pollution may have been included ~~occur~~ in this cluster as well, but without sufficiently different impacts on aerosol parameters to justify result in a distinct cluster.

5. Organic Event: An approximately ~~four-hour~~four-hour period starting at 1Z on 23 Sept, had measured particle concentrations between 200 and 325  $\text{cm}^{-3}$ , but with significantly ( $p < 0.001$ ) larger median diameters than either the precipitation or background marine types (Figure 3). Both Aitken and accumulation mode particles had among the lowest hygroscopicities measured during the cruise, with  $\kappa$  values around 0.2. During this event measured concentrations of numerous VOCs were much higher than in gas canisters collected approximately 6 hours before and after it, with no associated increase in carbon monoxide (Reid et al., 2016; Figure 2c). The particles had lower hygroscopicities and larger sizes than the background marine particles ~~which were~~ observed just before this event. While the source of this event is uncertain, Robinson et al. (2012) found occasional organic aerosol above the boundary layer they attributed to biogenic Secondary Organic Aerosol (SOA) formation during an airborne campaign in the outflow regions of Borneo, while Irwin et al. (2011) reported  $\kappa$  values between 0.05 and 0.37 in a

terrestrial, biogenically dominated MC environment. Such a source would be consistent with the observed population, perhaps due to growth of a background marine population by condensation of organics might create aerosol similar to this type, although we lack the ancillary data needed to establish this.

6. Ultrafine Event: This cluster was associated with an approximately 20-hour period on 17-18 Sept. that included the highest concentration of particles below about 30 nm observed throughout the study (Figure 2a), and coincided with a period of elevated VOC measurements as discussed in Sect. 3.2, which coincided with at the start of this event (Figure 2c). A filter during this period showed very low potassium concentrations, while benzene was among the lowest values measured during the study, indicating that biomass burning was not the likely source for this event. Anthropogenic, shipping, and marine and terrestrial biogenic emissions are known sources of such compounds; isoprene, a common biogenic VOC, was not observed during this event, and a brief period of elevated dimethyl sulfide, associated with marine emissions from phytoplankton, was observed shortly before—but not during—this event (Reid et al., 2016).

6. the largest concentrations of particles below about 30 nm during the study—A tri-modal best-fit was indicated by the Hussein, et al. (2005) algorithm for a number of these data points (Figure 2a and Supplementary Figure S1). The period had an overall IQR of 482 to 661  $\text{cm}^{-3}$ , with generally higher ultrafine number concentrations than other periods with similar total concentrations. The accumulation mode was similar in both size and hygroscopicity ( $\kappa = 0.65$ ) to the accumulation mode of the background marine type, while the smaller Aitken mode showed larger modal fractions and overall number concentrations, and slightly higher hygroscopicities ( $\kappa = 0.50$ ) as compared to than the clean background marine measurements. However, we note that the 0.38% supersaturation hygroscopicity measurement would likely not have been sensitive to these below 30 nm particles, and therefore was likely not representative of this smallest third mode. Additionally, while total number concentration was slightly higher than the background marine population, measured CCN concentrations and activated fractions were generally lower, indicating many of the additional particles would not be expected to influence CCN concentrations until higher environmental supersaturations were reached. While not enough information is available to verify the nature of differences between ultrafine particles in these types, the results are consistent with an influx of smaller particles and VOCs into a background marine air mass, and were sufficiently distinct to be identified as a coherent period by the unsupervised K-Means analysis.

7. Transit: This type was assigned associated with to the cluster that identified measurements taken during the a transit away from the port to the east of Puerto Princessa, a city with a population of over 200,000. During this period light, when westerly winds advected anthropogenic pollution out over the Sulu Sea and along the path of the Vasco, allowing for sampling of the urban plume as it diluted and mixed with aerosol from other sources. Size distributions were dominated by an Aitken mode with a number median diameter around 80-90 nm, unique in measurements from this study, mixed with an accumulation mode with a smaller modal fraction than other types. The population had an IQR of 738 to 1029  $\text{cm}^{-3}$ , while The size distribution measurements the generally decreasing number

~~concentrations were consistent with an urban plume diluting via and mixing with background marine type other aerosol populations. Modal hygroscopicity values of 0.58 and 0.62 for the accumulation and Aitken modes, respectively, were closer than those most of the other population types and consistent with high levels of sulfate aerosol in typical urban plumes, and had an IQR of 738 to 1029 cm<sup>-3</sup>.~~

- 5 8. Port: This type was assigned to the measurements taken during ~~the a~~ short period in the port of Puerto Princessa. Local anthropogenic emissions were dominant during this period, with number concentrations ~~that fluctuated~~ between 4000 and 10,000 cm<sup>-3</sup>. ~~Ultrafine particles (D<sub>p</sub> < 100 nm) dominated number concentrations during this period, although large number concentrations of accumulation mode particles with diameters between 100 and 300 nm were also observed. The majority of particles were in the ultrafine size range (D<sub>p</sub> < 100 nm). As measurements were fluctuating rapidly and only one CCN scan at each supersaturation setting could be completed before instrumentation was shut down, hygroscopicity results were inconclusive and uncertain.~~ This type is considered separate from the other types as it was not measured in a remote marine area away from the immediate influence of a nearby terrestrial source.

15 Finally, throughout the study coarse mode particles with diameters larger than about 800 nm were consistently observed in the PCASP volume distributions (Figure 2b). Concentrations of particles in this size range increased with increasing wind speed (Figure 5), consistent with generation of sea spray aerosol due to bubble breaking and wave action (O'Dowd and Leeuw, 2007), ~~and with less of a relationship to submicron aerosol population type. In addition, no significant relationship between wind speed and fine mode aerosol population type was noted.~~ Particles in ~~this size~~ coarse mode range are not measured or accounted for in our measurements (CCN system range: 17-500 nm), ~~and while the total concentration of coarse particles is small. While the number of particles in this size range is small~~ compared to typical CCN concentrations (Figures 2e, f), in the cleanest conditions we measured they represented non-trivial fractions of CCN active at 0.14% and 0.38% supersaturations. The large diameter of these particles makes them likely to activate at very low supersaturations, and they are present in more than sufficient number concentration to impact the microphysical structure and processes in stratocumulus clouds by serving as “giant CCN” (Feingold et al., 1999).

### 25 **3.4 Aerosol Hygroscopicity**

30 ~~The hygroscopicity parameter,  $\kappa$ , can be used to quantify the expected role of particle composition on water uptake and activation to cloud droplets (Petters and Kreidenweis, 2007). Anthropogenic pollution from urban areas often includes highly hygroscopic species such as ammonium sulfate ( $\kappa = 0.61$ ) and ammonium nitrate ( $\kappa = 0.67$ ), although non- or weakly hygroscopic species such as black carbon and nonpolar organic species are also common aerosol components. Fresh sea spray particles, dominated by sodium chloride ( $\kappa = 1.28$ ), are expected to have the highest  $\kappa$  values (Good et al., 2010), although co-emitted organic species and replacement of chlorine by uptake of acidic gases can potentially reduce  $\kappa$ . Aged biomass burning aerosol or organic dominated particle populations have generally been found to have  $\kappa$  values below 0.2, while black carbon ( $\kappa \approx 0$ ) has very low hygroscopicity (Andreae and Rosenfeld, 2008; Petters et al., 2009; Engelhart et al.,~~

2012). Similar size-resolved hygroscopicity measurements were performed in a remote rainforest location in Borneo by Irwin et al. (2011) during a time period with little to no biomass burning. They reported  $\kappa$  values between 0.05 and 0.37 for this terrestrial, biogenically dominated MC environment.

The range of  $\kappa$  values measured for the particles active at supersaturations of 0.14% and 0.38% was typically between about 0.3 and 0.8, although the full range was between 0.2 and 1.1 (Figures 2e, f). Average hygroscopicities and standard deviations for each population type at the 0.14% and 0.38% supersaturations are presented in Table 21, along with the average CN and CCN concentrations across all supersaturation settings. It is important to note that particle sizes ( $D_{50}$ : characteristic particle diameter at which 50% of particles in the CCN<sub>e</sub> have activated) corresponding to these measurements are in the range of 45–150 nm; our measurements did not characterize the hygroscopicities of either the very small particles ( $D_{50} < 45$  nm) nor the particles with diameters above 150 nm.

The 0.14% supersaturation scans have  $D_{50}$  diameters that span approximately 96 to 150 nm for  $\kappa$  values between the approximate observed range of 0.8 and 0.2, respectively. Hygroscopicity measurements at this lowest supersaturation are therefore more sensitive to particles in the larger accumulation mode—hence our segregation of a subset of observations of  $\kappa$  into accumulation and Aitken parameters for clustering purposes. The averaged properties in Table 21 indicated that such accumulation mode particles had lower average hygroscopicities ( $\kappa = 0.40$ ) in the smoke population type as compared to the precipitation, background marine, ultrafine event, and transit populations ( $\kappa = 0.54, 0.65, 0.65, 0.58$ , respectively), while the mixed marine population ( $\kappa = 0.48$ ) resided between these.

High concentrations of both SO<sub>2</sub> and sulfate aerosol from numerous sources have been observed in the MC (Robinson et al., 2011; Reid et al., 2013). During this study, multi day filter samples showed average sulfate concentrations between approximately 0.8 and 3  $\mu\text{g}/\text{m}^3$  at the Vasco, potentially increasing during periods of smoke impacts due to burning of sulfur rich peat in the region (Reid et al., 2016). The potential peat source or mixing with other sources of sulfate may explain the higher than typical  $\kappa$  values for aged biomass burning aerosol.

The hygroscopicities derived from measurements at the 0.38% supersaturation set point had different trends. At the 0.38% supersaturation setting, activation occurs for particles sized between roughly 45 and 80 nm for particles in the observed 1.1 to 0.2  $\kappa$  range, respectively, and thus measurements at this supersaturation were more closely identified with Aitken mode particles. During smoke impacted periods, the Aitken mode particles had  $\kappa$  values of 0.56 as compared with the 0.40 value observed in the accumulation mode. The aged, primary emissions from biomass burning are likely to be confined to particles larger than 100 nm (Figure 4), and it is therefore possible that the Aitken mode particles in this population were largely derived from background sources rather than from biomass burning, leading to the higher observed  $\kappa$  values.

Interestingly, the opposite situation occurred in the background marine and precipitation aerosol populations, where the Aitken mode was less hygroscopic than the accumulation mode (clean marine:  $\kappa = 0.46$  and  $\kappa = 0.65$ , respectively; precipitation:  $\kappa = 0.34$  and  $\kappa = 0.54$ , respectively). Decreasing hygroscopicity with size is consistent with an increasing organic fraction at smaller particle sizes in marine aerosol, as has been observed both in field data and in the laboratory (Cavalli et al., 2004; O'Dowd et al., 2004; Facchini et al., 2008; Prather et al., 2013). These observations are also consistent

with precipitation removal of some of the background sulfate aerosol, leading to lower hygroscopicities in cleaner aerosol populations due to marine organic aerosol becoming more dominant.

Finally, the organic event type had the lowest values ( $\kappa \sim 0.2$ ) in both modes from the entire study. A gas canister grab sample during this period showed elevated levels of a number of organic compounds (Reid et al., 2016; Figure 2e), while the size distributions were similar to those of the background marine population type, but with slightly larger diameters (Figures 3 & 4). These results are consistent with particles dominated by organics across all sizes, perhaps due to growth of a background population by condensation of organics.

#### 4 Discussion

Based on this classification of the SCS remote marine boundary layer aerosol environment, a conceptual picture emerges as to the nature and sources of particles encountered during the *Vasco* 2012 cruise. A bimodal marine aerosol background was present with number concentrations usually between about 300 and 700  $\text{cm}^{-3}$  and a Hoppel minimum around 90 nm. Primary emissions via sea spray supply submicron particles consisting of a mixture of sea salt and organic components, with emitted particle diameters as small as 20 nm (Clarke et al., 2006; O'Dowd and Leeuw, 2007; Prather et al., 2013). However, but even in remote marine environments, transported anthropogenic and combustion aerosol may still be an important or even dominant source of small particles (Shank et al., 2012). The background marine population identified in this study is thus therefore considered a background state across the remote SCS that is likely comprised of a mixture of primary marine emissions along with particles derived from anthropogenic and biomass burning sources throughout the region. Departures from the typical range of background marine characteristics and number concentrations occurred under large influxes of aerosol from other sources, such as smoke from biomass burning regions, anthropogenic pollution from population centers or shipping, or when convection and precipitation removed much of the ambient particulate matter and created relatively clean air masses.

During the SWM when large amounts of biomass burning aerosol were being advected into the SCS, a population of aged, accumulation mode smoke particles was periodically injected into the MBL where it mixed with existing particles. When total particle concentrations were above roughly 1500  $\text{cm}^{-3}$ , (Figure 3), the smoke particles dominated the background clean marine particles and had characteristic size distribution parameters and hygroscopicities that remained roughly constant regardless of further increases in the concentrations of biomass burning particles. In situations when smoke concentrations were insufficient to dominate the background marine aerosol population, a mixture of smoke and mixed with the background clean marine population types was present, with yielding size distribution and hygroscopicity parameters in between the two types. While the background marine type was earlier noted to be impacted to some extent by background anthropogenic or terrestrial aerosol similar to impacts noted for the mixed marine type, the later was characterized by mixing with a separate, distinct aerosol population, but at levels that were insufficient to dominate the background aerosol properties.

Precipitation ~~removes-removal of~~ particles that ~~have had~~ been advected into the region or ventilation by cleaner air masses when transport pathways changed returned the environment near the surface to its clean-background marine ~~background~~ state. However, when extensive precipitation occurred, accumulation mode particles were removed by wet deposition to a greater extent than Aitken mode particles, leading to lower overall surface number concentrations that were dominated by smaller particles, as evidenced by the emergence of a distinct precipitation population type from the cluster analysis. Based on the two *Vasco* cruises, the cleanest periods were encountered in cold pools following the passage of squall lines with number concentrations as low as 100 to 150 cm<sup>-3</sup>. During these periods, increased number concentrations of coarse mode aerosol were regularly observed (Figure 5; CN<sub>>800</sub>: 5.5 ± 2.1 cm<sup>-3</sup>), that constituted a potentially important additional source of total CCN not measured by the CCN system (0.14% SS: 44 ± 25 cm<sup>-3</sup>; 0.38% SS: 70 ± 36 cm<sup>-3</sup>), particularly at low supersaturations where they would be expected to activate first.

In addition to these findings, several observed phenomena during the 2012 study were similar to those from the 2011 cruise (Reid et al., 2015). In particular, rapid changes in aerosol properties and source type were noted in the wake of squall lines that left clean air masses in their wake, while longer period fluctuations on the order of days occurred as impacts from anthropogenic and smoke transport mixed with cleaner background marine and precipitation impacted air masses. As both studies were conducted in the remote marine SCS during the biomass burning season and saw similar meteorological phenomena modulating the aerosol populations, the more detailed aerosol property results of the 2012 cruise may be representative of the general nature of changes in SCS remote marine aerosol during the SWM season. Future work in the region to compare surface properties with model results and satellite retrievals will be ultimately required to fully validate these findings.

While the cluster analysis assigned each data point to a single cluster, in reality these first four clusters could be better described as a spectrum due to the variable impacts of mixing or meteorological processes, rather than as distinct or mutually exclusive population types. As is evident in Figure 3, overlap between these four clusters occurred in the parameter space for all nine of the measured variables used in the cluster model.

Deviations from this general picture arose when influxes of other aerosol types occurred. The additional population types each mapped out generally distinct areas in one or more of the parameters, leading to their identification by the cluster model. That such clusters corresponded to temporally distinct periods with physical and meteorological relevance ultimately justified the use of the cluster model to classify aerosol population types and assign rough population boundaries to the parameter space.

While the spectrum of mixing between population types is relevant to the identification of impacts from various sources, additional consideration of these aerosol types against measurements in other regions is also warranted. Fresh sea spray particles, dominated by sodium chloride ( $\kappa = 1.28$ ), are expected to have the highest  $\kappa$  values (Good et al., 2010), although co-emitted organic species and replacement of chlorine by uptake of acidic gases can potentially reduce hygroscopicities. Additionally, increasing organic fractions at smaller sizes have been reported in sea spray aerosol (Prather et al., 2013), leading to decreased hygroscopicities as ~~organic fraction increases~~ particle size decreases. Such findings are consistent with

the lower Aitken mode hygroscopicities found in the background marine populations observed in this dataset, as well as the additional decreases in hygroscopicity noted in the precipitation population that had been further scrubbed of larger accumulation mode particles.

Aged biomass burning aerosol have often been found to have  $\kappa$  values below 0.2 (Andreae and Rosenfeld, 2008; Petters et al., 2009; Engelhart et al., 2012), while below the smoke population type average of approximately 0.4 in the accumulation mode during this study. However, high concentrations of both  $\text{SO}_2$  and sulfate aerosol (ammonium sulfate,  $\kappa = 0.61$ ) from numerous sources have been observed in the MC (Robinson et al., 2011; Reid et al., 2013). During this study, multi-day filter samples showed average sulfate concentrations between approximately 0.8 and  $3 \mu\text{g}/\text{m}^3$  at the *Vasco*, potentially increasing during periods of smoke impacts due to burning of sulfur rich peat in the region (Reid et al., 2016). The potential peat source or mixing with other sources of sulfate may explain the higher than typical  $\kappa$  values observed for aged biomass burning aerosol in the MC.

Cloud droplet formation updraft velocity and aerosol population parameters

During the transit through an anthropogenic urban plume, size distributions were dominated by an Aitken mode with 80 to 90 nm median diameters that slowly transformed, with distance from the urban center, into a more typical mixed marine type population. After a marked increase in some VOC concentrations at 19Z on 17 Sept (3 AM local) a smaller ultrafine mode of particles was observed several hours later, possibly due to photochemical processes. Larger Aitken modal fractions with higher geometric standard deviations were observed, while the accumulation mode remained similar to the background marine type. A separate event marked by an increase in VOC measured by the gas canister samples occurred on 23 Sept, characterized by a different aerosol distribution that may have mixed from aloft.

In addition to these general classifications, several interesting periods during the 2012 cruise were observed that warrant additional discussion. Short lived intrusions (two to five hours) of accumulation mode particles were regularly observed in both the CCN system and PCASP datasets, and were classified as part of the mixed marine population type (e.g. 18–23Z on 22, 23, and 24 Sep) after which the size distributions quickly returned to clean marine conditions. These excursions were largely constrained to the pre dawn hours (sunrise occurs around 22Z) when the boundary layer was thinnest, and when precipitation was occurring in the vicinity of the *Vasco*. Several prior studies have shown that smoke and anthropogenic pollution aerosol within the wider MC region can be lofted into and transported in the lower free troposphere (Tosea et al., 2011; Robinson et al., 2012; Zender et al., 2012; Campbell et al., 2013; Atwood et al., 2013). The influence of a free tropospheric aerosol layer as a source of MBL aerosol and CCN concentrations has been identified in other remote oceanic regions as well (Clarke et al., 2013). One possible explanation for these events, and possibly for the observed organic and ultrafine events that were characterized by increases in gas phase VOCs, is therefore that aerosol may have been mixed down into the MBL from a layer aloft, perhaps on the edge of rain shafts. However, they may also be due to intermittent plumes of aerosol that survived stochastic precipitation removal events along a boundary layer transport pathway or human terrestrial activities in the pre dawn hours. Future work in the region may provide further insight into these events and the potential importance of an aerosol layer aloft.



## 5 Conclusion

This study reports ship based measurements of aerosol size distributions and CCN properties conducted as part of the first extensive, in situ aerosol measurement campaign in remote marine regions of the South China Sea/East Sea during the important Southwestern Monsoon and biomass burning season. Analysis of approximately two weeks of measurements found aerosol characteristics consistent with those from a previous pilot study in the region during the same season, indicating that descriptions of aerosol population types and the associated meteorological and transport phenomena that modulate changes and mixing between these populations may be representative of the wider remote marine SCS during the SWM season.~~the regional and temporal representativeness of these results.~~

Eight aerosol population types were identified in the dataset that were associated with various impacts from background marine particles, smoke, and anthropogenic sources, as well as precipitation impacts and shorter lived events linked to influxes of VOCs or ultrafine particles. Efforts to measure or model the impact of aerosol on cloud development or atmospheric optical properties often rely on proper characterization of aerosol microphysics associated with impacts from various aerosol sources. As such, we provided population type average values and standard deviations for aerosol size distribution and hygroscopicity properties needed to model aerosol hygroscopic growth in humid environments or cloud development. Future work with this dataset will investigate the impact of the identified aerosol population types on CCN properties including supersaturation dependent CCN concentration needed to model development of different types of clouds. Reutter et al., (2009) identified specific regimes of cloud development where aerosol number concentration was important using a cloud parcel model, while Ward et al., (2010) found such results may be further complicated by aerosol size and hygroscopic properties. Inclusion of both population type average properties and the range that they vary across into such a model may help constrain when various properties of the aerosol are relevant to cloud development in the SCS. Additionally, differences in aerosol population type are expected to be relevant to studies of radiative transfer, optical propagation through the atmosphere, and satellite retrievals in sub-saturated marine environments where differences in particle number concentration, size, hygroscopicity, index of refraction, and relative humidity all affect the interaction radiation with particles in complex ways.~~Many of the CCN relevant differences between the aerosol population types (particularly for processes involving supersaturations at about 0.3% or higher) occurred in Aitken mode particles. It should be noted that many measurements of aerosol based on either optical or mass properties, including typical aerosol models and satellite retrievals, will be minimally impacted by Aitken mode particles, and therefore may not be especially sensitive to important changes in CCN abundance and properties as detected in with these in situ observations. Future work with this dataset will therefore investigate if coincident optical measurements of both dry and humidified aerosol can be related to CCN properties given the aerosol properties associated with population types found here.~~

Lastly, while specific observed aerosol population types were identified in this dataset, additional open questions remain regarding the relative importance of various sources and transport pathways of aerosol into remote MBL air masses and their impact on aerosol populations. Since the surface-based observations provide only a portion of the observations needed to



construct a true aerosol budget for the MBL, the degree to which MBL aerosol may be impacted by mixing down from a reservoir aloft was not clear. Future airborne aerosol campaigns in the region may be useful to shed light on this important topic.

5 **Acknowledgments.** Funding for this research cruise and analysis was provided from a number of sources. Vasco ship time procurement was provided by the NRL 6.1 Base Program via an ONR Global grant to the Manila Observatory. Core funding for this effort was from Office of Naval Research 322 under Award Number N00014-16-1-2040 and the Naval Research Enterprise Internship Program (NREIP). Funding for NRL scientist participation was provided by the NRL Base Program and ONR 35. This material is based upon research supported by the Office of Naval Research under Award Number  
10 N00014-16-1-2040, and by the Colorado State University Center for Geosciences/Atmospheric Research (CG/AR). We are most grateful to the Vasco ship management and crew, operated by Cosmix Underwater Research Ltd, (esp. Luc Heymans and Annabelle du Parc), the Manila Observatory senior management (esp. Antonia Loyzaga and Fr. Daniel McNamara), and the US State Department/ Embassy in Manila (esp. Maria Theresa Villa and Dovas Saulys). [We would also like to thank the two anonymous reviewers for their insightful comments and helpful suggestions.](#)

## 15 **References**

- [Akagi, S. K., Yokelson, R. J., Wiedinmyer, C., Alvarado, M. J., Reid, J. S., Karl, T., Crounse, J. D. and Wennberg, P. O.: Emission factors for open and domestic biomass burning for use in atmospheric models, \*Atmos Chem Phys\*, 11\(9\), 4039–4072, doi:10.5194/acp-11-4039-2011, 2011.](#)
- [Andreae, M. O. and Rosenfeld, D.: Aerosol–cloud–precipitation interactions. Part 1. The nature and sources of cloud-active aerosols, \*Earth-Sci. Rev.\*, 89\(1–2\), 13–41, doi:10.1016/j.earscirev.2008.03.001, 2008.](#)
- [Andreae, M. O., Rosenfeld, D., Artaxo, P., Costa, A. A., Frank, G. P., Longo, K. M. and Silva-Dias, M. a. F.: Smoking Rain Clouds over the Amazon, \*Science\*, 303\(5662\), 1337–1342, doi:10.1126/science.1092779, 2004.](#)
- [Atwood, S. A., Reid, J. S., Kreidenweis, S. M., Yu, L. E., Salinas, S. V., Chew, B. N. and Balasubramanian, R.: Analysis of source regions for smoke events in Singapore for the 2009 El Nino burning season, \*Atmos. Environ.\*, 78, 219–230, doi:10.1016/j.atmosenv.2013.04.047, 2013.](#)
- [Balasubramanian, R., Qian, W.-B., Decesari, S., Facchini, M. C. and Fuzzi, S.: Comprehensive characterization of PM2.5 aerosols in Singapore, \*J. Geophys. Res. Atmospheres\*, 108\(D16\), 4523, doi:10.1029/2002JD002517, 2003.](#)
- [Campbell, J. R., Reid, J. S., Westphal, D. L., Zhang, J., Tackett, J. L., Chew, B. N., Welton, E. J., Shimizu, A., Sugimoto, N., Aoki, K. and Winker, D. M.: Characterizing the vertical profile of aerosol particle extinction and linear depolarization over Southeast Asia and the Maritime Continent: The 2007–2009 view from CALIOP, \*Atmospheric Res.\*, 122, 520–543, doi:10.1016/j.atmosres.2012.05.007, 2013.](#)
- [Clarke, A. D., Owens, S. R. and Zhou, J.: An ultrafine sea-salt flux from breaking waves: Implications for cloud condensation nuclei in the remote marine atmosphere, \*J. Geophys. Res. Atmospheres\*, 111\(D6\), D06202, doi:10.1029/2005JD006565, 2006.](#)

- Clarke, A. D., Freitag, S., Simpson, R. M. C., Hudson, J. G., Howell, S. G., Brekhovskikh, V. L., Campos, T., Kapustin, V. N. and Zhou, J.: Free troposphere as a major source of CCN for the equatorial pacific boundary layer: long-range transport and teleconnections, *Atmos Chem Phys*, 13(15), 7511–7529, doi:10.5194/acp-13-7511-2013, 2013.
- 5 [Draxler, R. R. and Hess, G. D.: Description of the HYSPLIT4 modeling system, \[online\] Available from: http://warn.arl.noaa.gov/documents/reports/arl-224.pdf \(Accessed 14 April 2015\), 1997.](http://warn.arl.noaa.gov/documents/reports/arl-224.pdf)
- [Draxler, R. R. and Hess, G. D.: An overview of the HYSPLIT\\_4 modelling system for trajectories, \*Aust. Meteorol. Mag.\*, 47\(4\), 295–308, 1998.](#)
- [Draxler, R. R., Stunder, B., Rolph, G. and Taylor, A.: HYSPLIT4 user's guide, NOAA Tech. Memo. ERL ARL, 230, 35, 1999.](#)
- 10 [Engelhart, G. J., Hennigan, C. J., Miracolo, M. A., Robinson, A. L. and Pandis, S. N.: Cloud condensation nuclei activity of fresh primary and aged biomass burning aerosol, \*Atmos Chem Phys\*, 12\(15\), 7285–7293, doi:10.5194/acp-12-7285-2012, 2012.](#)
- 15 [Feingold, G., Cotton, W. R., Kreidenweis, S. M. and Davis, J. T.: The Impact of Giant Cloud Condensation Nuclei on Drizzle Formation in Stratocumulus: Implications for Cloud Radiative Properties, \*J. Atmospheric Sci.\*, 56\(24\), 4100–4117, doi:10.1175/1520-0469\(1999\)056<4100:TIOGCC>2.0.CO;2, 1999.](#)
- [Feng, N. and Christopher, S. A.: Satellite and surface-based remote sensing of Southeast Asian aerosols and their radiative effects, \*Atmospheric Res.\*, 122, 544–554, doi:10.1016/j.atmosres.2012.02.018, 2013.](#)
- [Giglio, L., Descloitres, J., Justice, C. O. and Kaufman, Y. J.: An Enhanced Contextual Fire Detection Algorithm for MODIS, \*Remote Sens. Environ.\*, 87\(2–3\), 273–282, doi:10.1016/S0034-4257\(03\)00184-6, 2003.](#)
- 20 [Good, N., Topping, D. O., Allan, J. D., Flynn, M., Fuentes, E., Irwin, M., Williams, P. I., Coe, H. and McFiggans, G.: Consistency between parameterisations of aerosol hygroscopicity and CCN activity during the RHaMBLe discovery cruise, \*Atmos Chem Phys\*, 10\(7\), 3189–3203, doi:10.5194/acp-10-3189-2010, 2010.](#)
- 25 [Hewitt, C. N., Lee, J. D., MacKenzie, A. R., Barkley, M. P., Carslaw, N., Carver, G. D., Chappell, N. A., Coe, H., Collier, C., Commane, R., Davies, F., Davison, B., DiCarlo, P., Di Marco, C. F., Dorsey, J. R., Edwards, P. M., Evans, M. J., Fowler, D., Furneaux, K. L., Gallagher, M., Guenther, A., Heard, D. E., Helfter, C., Hopkins, J., Ingham, T., Irwin, M., Jones, C., Karunaharan, A., Langford, B., Lewis, A. C., Lim, S. F., MacDonald, S. M., Mahajan, A. S., Malpass, S., McFiggans, G., Mills, G., Misztal, P., Moller, S., Monks, P. S., Nemitz, E., Nicolas-Perea, V., Oetjen, H., Oram, D. E., Palmer, P. I., Phillips, G. J., Pike, R., Plane, J. M. C., Pugh, T., Pyle, J. A., Reeves, C. E., Robinson, N. H., Stewart, D., Stone, D., Whalley, L. K. and Yin, X.: Overview: oxidant and particle photochemical processes above a south-east Asian tropical rainforest \(the OP3 project\): introduction, rationale, location characteristics and tools, \*Atmos Chem Phys\*, 10\(1\), 169–199, doi:10.5194/acp-10-169-2010, 2010.](#)
- 30 [Hogan, T. F. and Rosmond, T. E.: The Description of the Navy Operational Global Atmospheric Prediction System's Spectral Forecast Model, \*Mon. Weather Rev.\*, 119\(8\), 1786–1815, doi:10.1175/1520-0493\(1991\)119<1786:TDOTNO>2.0.CO;2, 1991.](#)
- 35 [Hoppel, W. A., Frick, G. M. and Larson, R. E.: Effect of nonprecipitating clouds on the aerosol size distribution in the marine boundary layer, \*Geophys. Res. Lett.\*, 13\(2\), 125–128, doi:10.1029/GL013i002p00125, 1986.](#)

- Hoppel, W. A., Frick, G. M., Fitzgerald, J. W. and Larson, R. E.: Marine boundary layer measurements of new particle formation and the effects nonprecipitating clouds have on aerosol size distribution, *J. Geophys. Res. Atmospheres*, 99(D7), 14443–14459, doi:10.1029/94JD00797, 1994.
- 5 Hussein, T., Dal Maso, M., Petäjä, T., Koponen, I. K., Paatero, P., Aalto, P. P., Hämeri, K. and Kulmala, M.: Evaluation of an automatic algorithm for fitting the particle number size distributions, *Boreal Environ. Res.*, 10(5), 337–355, 2005.
- Hyer, E. J., Reid, J. S., Prins, E. M., Hoffman, J. P., Schmidt, C. C., Miettinen, J. I. and Giglio, L.: Patterns of fire activity over Indonesia and Malaysia from polar and geostationary satellite observations, *Atmospheric Res.*, 122, 504–519, doi:10.1016/j.atmosres.2012.06.011, 2013.
- 10 Irwin, M., Robinson, N., Allan, J. D., Coe, H. and McFiggans, G.: Size-resolved aerosol water uptake and cloud condensation nuclei measurements as measured above a Southeast Asian rainforest during OP3, *Atmos Chem Phys*, 11(21), 11157–11174, doi:10.5194/acp-11-11157-2011, 2011.
- Levin, E. J. T., McMeeking, G. R., Carrico, C. M., Mack, L. E., Kreidenweis, S. M., Wold, C. E., Moosmüller, H., Arnott, W. P., Hao, W. M., Collett, J. L. and Malm, W. C.: Biomass burning smoke aerosol properties measured during Fire Laboratory at Missoula Experiments (FLAME), *J. Geophys. Res. Atmospheres*, 115(D18), D18210, doi:10.1029/2009JD013601, 2010.
- 15 Lin, N.-H., Sayer, A. M., Wang, S.-H., Loftus, A. M., Hsiao, T.-C., Sheu, G.-R., Hsu, N. C., Tsay, S.-C. and Chantara, S.: Interactions between biomass-burning aerosols and clouds over Southeast Asia: Current status, challenges, and perspectives, *Environ. Pollut.*, 195, 292–307, doi:10.1016/j.envpol.2014.06.036, 2014.
- Lynch, P., Reid, J. S., Westphal, D. L., Zhang, J., Hogan, T. F., Hyer, E. J., Curtis, C. A., Hegg, D. A., Shi, Y., Campbell, J. R., Rubin, J. I., Sessions, W. R., Turk, F. J. and Walker, A. L.: An 11-year global gridded aerosol optical thickness reanalysis (v1.0) for atmospheric and climate sciences, *Geosci Model Dev*, 9(4), 1489–1522, doi:10.5194/gmd-9-1489-2016, 2016.
- 20 O’Dowd, C. D. and Leeuw, G. de: Marine aerosol production: a review of the current knowledge, *Philos. Trans. R. Soc. Math. Phys. Eng. Sci.*, 365(1856), 1753–1774, doi:10.1098/rsta.2007.2043, 2007.
- O’Dowd, C. D., Smith, M. H., Consterdine, I. E. and Lowe, J. A.: Marine aerosol, sea-salt, and the marine sulphur cycle: a short review, *Atmos. Environ.*, 31(1), 73–80, doi:10.1016/S1352-2310(96)00106-9, 1997.
- Pedregosa, F., Varoquaux, G., Gramfort, A., Michel, V., Thirion, B., Grisel, O., Blondel, M., Prettenhofer, P., Weiss, R., Dubourg, V., Vanderplas, J., Passos, A., Cournapeau, D., Brucher, M., Perrot, M. and Duchesnay, É.: Scikit-learn: Machine Learning in Python, *J Mach Learn Res*, 12, 2825–2830, 2011.
- 30 Petters, M. D. and Kreidenweis, S. M.: A single parameter representation of hygroscopic growth and cloud condensation nucleus activity, *Atmos Chem Phys*, 7(8), 1961–1971, doi:10.5194/acp-7-1961-2007, 2007.
- Petters, M. D., Carrico, C. M., Kreidenweis, S. M., Prenni, A. J., DeMott, P. J., Collett, J. L. and Moosmüller, H.: Cloud condensation nucleation activity of biomass burning aerosol, *J. Geophys. Res. Atmospheres*, 114(D22), D22205, doi:10.1029/2009JD012353, 2009.
- 35 Prather, K. A., Bertram, T. H., Grassian, V. H., Deane, G. B., Stokes, M. D., DeMott, P. J., Aluwihare, L. I., Palenik, B. P., Azam, F., Seinfeld, J. H., Moffet, R. C., Molina, M. J., Cappa, C. D., Geiger, F. M., Roberts, G. C., Russell, L. M., Ault, A. P., Baltrusaitis, J., Collins, D. B., Corrigan, C. E., Cuadra-Rodriguez, L. A., Ebben, C. J., Forestieri, S. D., Guasco, T. L., Hersey, S. P., Kim, M. J., Lambert, W. F., Modini, R. L., Mui, W., Pedler, B. E., Ruppel, M. J., Ryder, O. S., Schoepp, N.

- G., Sullivan, R. C. and Zhao, D.: Bringing the ocean into the laboratory to probe the chemical complexity of sea spray aerosol, *Proc. Natl. Acad. Sci.*, 110(19), 7550–7555, doi:10.1073/pnas.1300262110, 2013.
- 5 Reid, J. S., Hyer, E. J., Prins, E. M., Westphal, D. L., Zhang, J., Wang, J., Christopher, S. A., Curtis, C. A., Schmidt, C. C., Eleuterio, D. P., Richardson, K. A. and Hoffman, J. P.: Global Monitoring and Forecasting of Biomass-Burning Smoke: Description of and Lessons From the Fire Locating and Modeling of Burning Emissions (FLAMBE) Program, *IEEE J. Sel. Top. Appl. Earth Obs. Remote Sens.*, 2(3), 144–162, doi:10.1109/JSTARS.2009.2027443, 2009.
- Reid, J. S., Xian, P., Hyer, E. J., Flatau, M. K., Ramirez, E. M., Turk, F. J., Sampson, C. R., Zhang, C., Fukada, E. M. and Maloney, E. D.: Multi-scale meteorological conceptual analysis of observed active fire hotspot activity and smoke optical depth in the Maritime Continent, *Atmos Chem Phys*, 12(4), 2117–2147, doi:10.5194/acp-12-2117-2012, 2012.
- 10 Reid, J. S., Hyer, E. J., Johnson, R. S., Holben, B. N., Yokelson, R. J., Zhang, J., Campbell, J. R., Christopher, S. A., Di Girolamo, L., Giglio, L., Holz, R. E., Kearney, C., Miettinen, J., Reid, E. A., Turk, F. J., Wang, J., Xian, P., Zhao, G., Balasubramanian, R., Chew, B. N., Janjai, S., Lagrosas, N., Lestari, P., Lin, N.-H., Mahmud, M., Nguyen, A. X., Norris, B., Oanh, N. T. K., Oo, M., Salinas, S. V., Welton, E. J. and Liew, S. C.: Observing and understanding the Southeast Asian aerosol system by remote sensing: An initial review and analysis for the Seven Southeast Asian Studies (7SEAS) program, *Atmospheric Res.*, 122, 403–468, doi:10.1016/j.atmosres.2012.06.005, 2013.
- 15 Reid, J. S., Lagrosas, N. D., Jonsson, H. H., Reid, E. A., Sessions, W. R., Simpas, J. B., Uy, S. N., Boyd, T. J., Atwood, S. A., Blake, D. R., Campbell, J. R., Cliff, S. S., Holben, B. N., Holz, R. E., Hyer, E. J., Lynch, P., Meinardi, S., Posselt, D. J., Richardson, K. A., Salinas, S. V., Smirnov, A., Wang, Q., Yu, L. and Zhang, J.: Observations of the temporal variability in aerosol properties and their relationships to meteorology in the summer monsoonal South China Sea/East Sea: the scale-dependent role of monsoonal flows, the Madden–Julian Oscillation, tropical cyclones, squall lines and cold pools, *Atmos Chem Phys*, 15(4), 1745–1768, doi:10.5194/acp-15-1745-2015, 2015.
- 20 Reid, J. S., Lagrosas, N. D., Jonsson, H. H., Reid, E. A., Atwood, S. A., Boyd, T. J., Ghate, V. P., Lynch, P., Posselt, D. J., Simpas, J. B., Uy, S. N., Zaiger, K., Blake, D. R., Bucholtz, A., Campbell, J. R., Chew, B. N., Cliff, S. S., Holben, B. N., Holz, R. E., Hyer, E. J., Kreidenweis, S. M., Kuciaskas, A. P., Lolli, S., Oo, M., Perry, K. D., Salinas, S. V., Sessions, W. R., Smirnov, A., Walker, A. L., Wang, Q., Yu, L., Zhang, J. and Zhao, Y.: Aerosol meteorology and Philippine receptor observations of Maritime Continent aerosol emissions for the 2012 7SEAS southwest monsoon intensive study, *Atmospheric Chem. Phys. Discuss.*, 1–61, doi:10.5194/acp-2016-214, 2016.
- 25 Reutter, P., Su, H., Trentmann, J., Simmel, M., Rose, D., Gunthe, S. S., Wernli, H., Andreae, M. O. and Pöschl, U.: Aerosol- and updraft-limited regimes of cloud droplet formation: influence of particle number, size and hygroscopicity on the activation of cloud condensation nuclei (CCN), *Atmos Chem Phys*, 9(18), 7067–7080, doi:10.5194/acp-9-7067-2009, 2009.
- 30 Robinson, N. H., Newton, H. M., Allan, J. D., Irwin, M., Hamilton, J. F., Flynn, M., Bower, K. N., Williams, P. I., Mills, G., Reeves, C. E., McFiggans, G. and Coe, H.: Source attribution of Bornean air masses by back trajectory analysis during the OP3 project, *Atmos Chem Phys*, 11(18), 9605–9630, doi:10.5194/acp-11-9605-2011, 2011.
- 35 Robinson, N. H., Allan, J. D., Trembath, J. A., Rosenberg, P. D., Allen, G. and Coe, H.: The lofting of Western Pacific regional aerosol by island thermodynamics as observed around Borneo, *Atmos Chem Phys*, 12(13), 5963–5983, doi:10.5194/acp-12-5963-2012, 2012.
- 40 Rose, D., Nowak, A., Achtert, P., Wiedensohler, A., Hu, M., Shao, M., Zhang, Y., Andreae, M. O. and Pöschl, U.: Cloud condensation nuclei in polluted air and biomass burning smoke near the mega-city Guangzhou, China – Part I: Size-resolved measurements and implications for the modeling of aerosol particle hygroscopicity and CCN activity, *Atmos Chem Phys*, 10(7), 3365–3383, doi:10.5194/acp-10-3365-2010, 2010.

Rosenfeld, D.: TRMM observed first direct evidence of smoke from forest fires inhibiting rainfall, *Geophys. Res. Lett.*, 26(20), 3105–3108, doi:10.1029/1999GL006066, 1999.

Sakamoto, K. M., Allan, J. D., Coe, H., Taylor, J. W., Duck, T. J. and Pierce, J. R.: Aged boreal biomass-burning aerosol size distributions from BORTAS 2011, *Atmos Chem Phys*, 15(4), 1633–1646, doi:10.5194/acp-15-1633-2015, 2015.

5 Shank, L. M., Howell, S., Clarke, A. D., Freitag, S., Brekhovskikh, V., Kapustin, V., McNaughton, C., Campos, T. and Wood, R.: Organic matter and non-refractory aerosol over the remote Southeast Pacific: oceanic and combustion sources, *Atmos Chem Phys*, 12(1), 557–576, doi:10.5194/acp-12-557-2012, 2012.

10 Spracklen, D. V., Pringle, K. J., Carslaw, K. S., Mann, G. W., Manktelow, P. and Heintzenberg, J.: Evaluation of a global aerosol microphysics model against size-resolved particle statistics in the marine atmosphere, *Atmos Chem Phys*, 7(8), 2073–2090, doi:10.5194/acp-7-2073-2007, 2007.

Tao, W.-K., Chen, J.-P., Li, Z., Wang, C. and Zhang, C.: Impact of aerosols on convective clouds and precipitation, *Rev. Geophys.*, 50(2), RG2001, doi:10.1029/2011RG000369, 2012.

15 Tosca, M. G., Randerson, J. T., Zender, C. S., Nelson, D. L., Diner, D. J. and Logan, J. A.: Dynamics of fire plumes and smoke clouds associated with peat and deforestation fires in Indonesia, *J. Geophys. Res. Atmospheres*, 116(D8), D08207, doi:10.1029/2010JD015148, 2011.

Wang, J., Ge, C., Yang, Z., Hyer, E. J., Reid, J. S., Chew, B.-N., Mahmud, M., Zhang, Y. and Zhang, M.: Mesoscale modeling of smoke transport over the Southeast Asian Maritime Continent: Interplay of sea breeze, trade wind, typhoon, and topography, *Atmospheric Res.*, 122, 486–503, doi:10.1016/j.atmosres.2012.05.009, 2013.

20 Ward, D. S., Eidhammer, T., Cotton, W. R. and Kreidenweis, S. M.: The role of the particle size distribution in assessing aerosol composition effects on simulated droplet activation, *Atmos Chem Phys*, 10(12), 5435–5447, doi:10.5194/acp-10-5435-2010, 2010.

Wilks, D. S.: *Statistical Methods in the Atmospheric Sciences*, Academic Press., 2011.

Xian, P., Reid, J. S., Atwood, S. A., Johnson, R. S., Hyer, E. J., Westphal, D. L. and Sessions, W.: Smoke aerosol transport patterns over the Maritime Continent, *Atmospheric Res.*, 122, 469–485, doi:10.1016/j.atmosres.2012.05.006, 2013.

25 Yokelson, R. J., Christian, T. J., Karl, T. G. and Guenther, A.: The tropical forest and fire emissions experiment: laboratory fire measurements and synthesis of campaign data, *Atmos Chem Phys*, 8(13), 3509–3527, doi:10.5194/acp-8-3509-2008, 2008.

Yu, F., Wang, Z., Luo, G. and Turco, R.: Ion-mediated nucleation as an important global source of tropospheric aerosols, *Atmos Chem Phys*, 8(9), 2537–2554, doi:10.5194/acp-8-2537-2008, 2008.

30 Yuan, T., Remer, L. A., Pickering, K. E. and Yu, H.: Observational evidence of aerosol enhancement of lightning activity and convective invigoration, *Geophys. Res. Lett.*, 38(4), L04701, doi:10.1029/2010GL046052, 2011.

Zender, C. S., Krolewski, A. G., Tosca, M. G. and Randerson, J. T.: Tropical biomass burning smoke plume size, shape, reflectance, and age based on 2001–2009 MISR imagery of Borneo, *Atmos Chem Phys*, 12(7), 3437–3454, doi:10.5194/acp-12-3437-2012, 2012.

35

Vasco Location & 72-hr 500 m HYSPLIT Backtrajectories

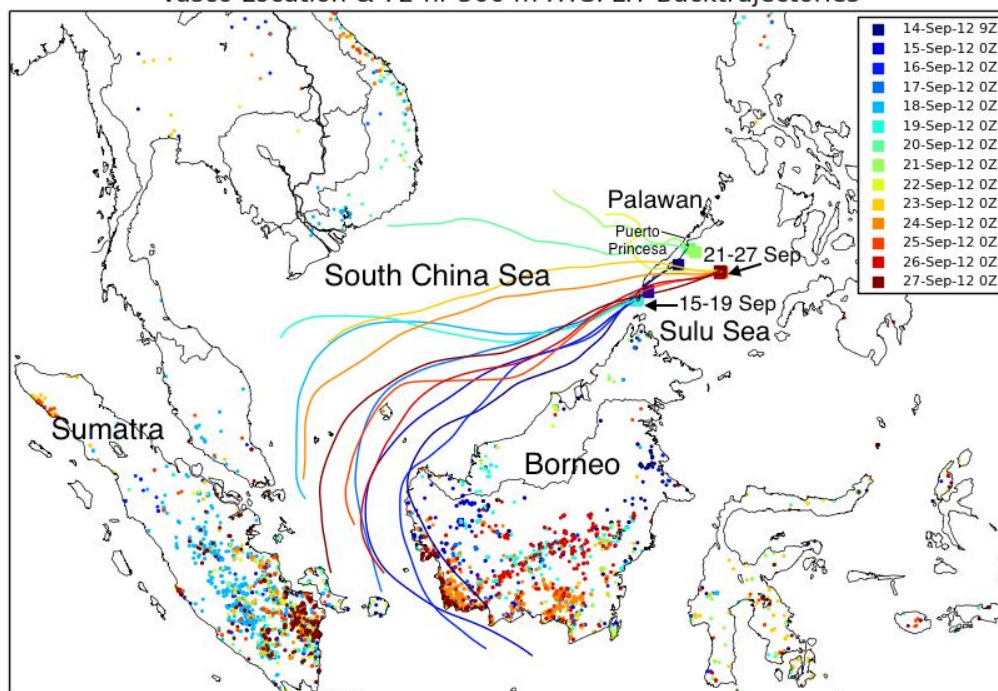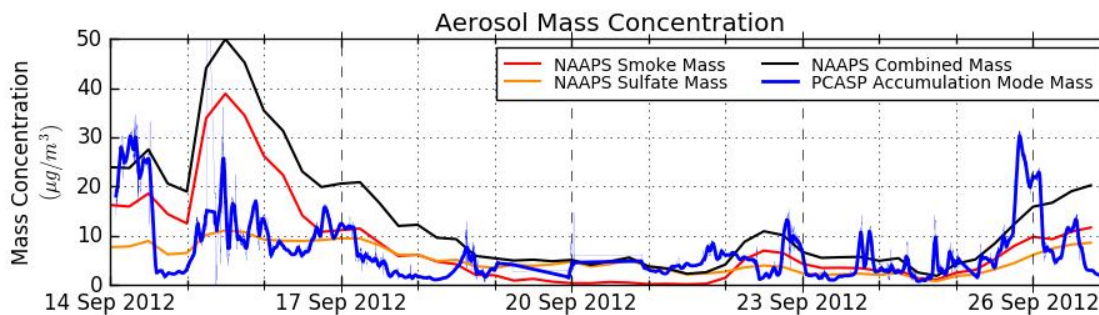

Figure 1: (a) *Vasco* cruise locations (squares) and 72-hour, 500 m HYSPLIT backtrajectories; MODIS fire detections (dots) from Terra and Aqua are included for each day (color coded) during the sampling period. (b) PCASP reconstructed accumulation mode (125nm – 800nm) mass concentration (assumed density  $1.4 \mu\text{g m}^{-3}$ ) and NAAPS estimated smoke and sulfate mass concentration along the *Vasco* ship-track.



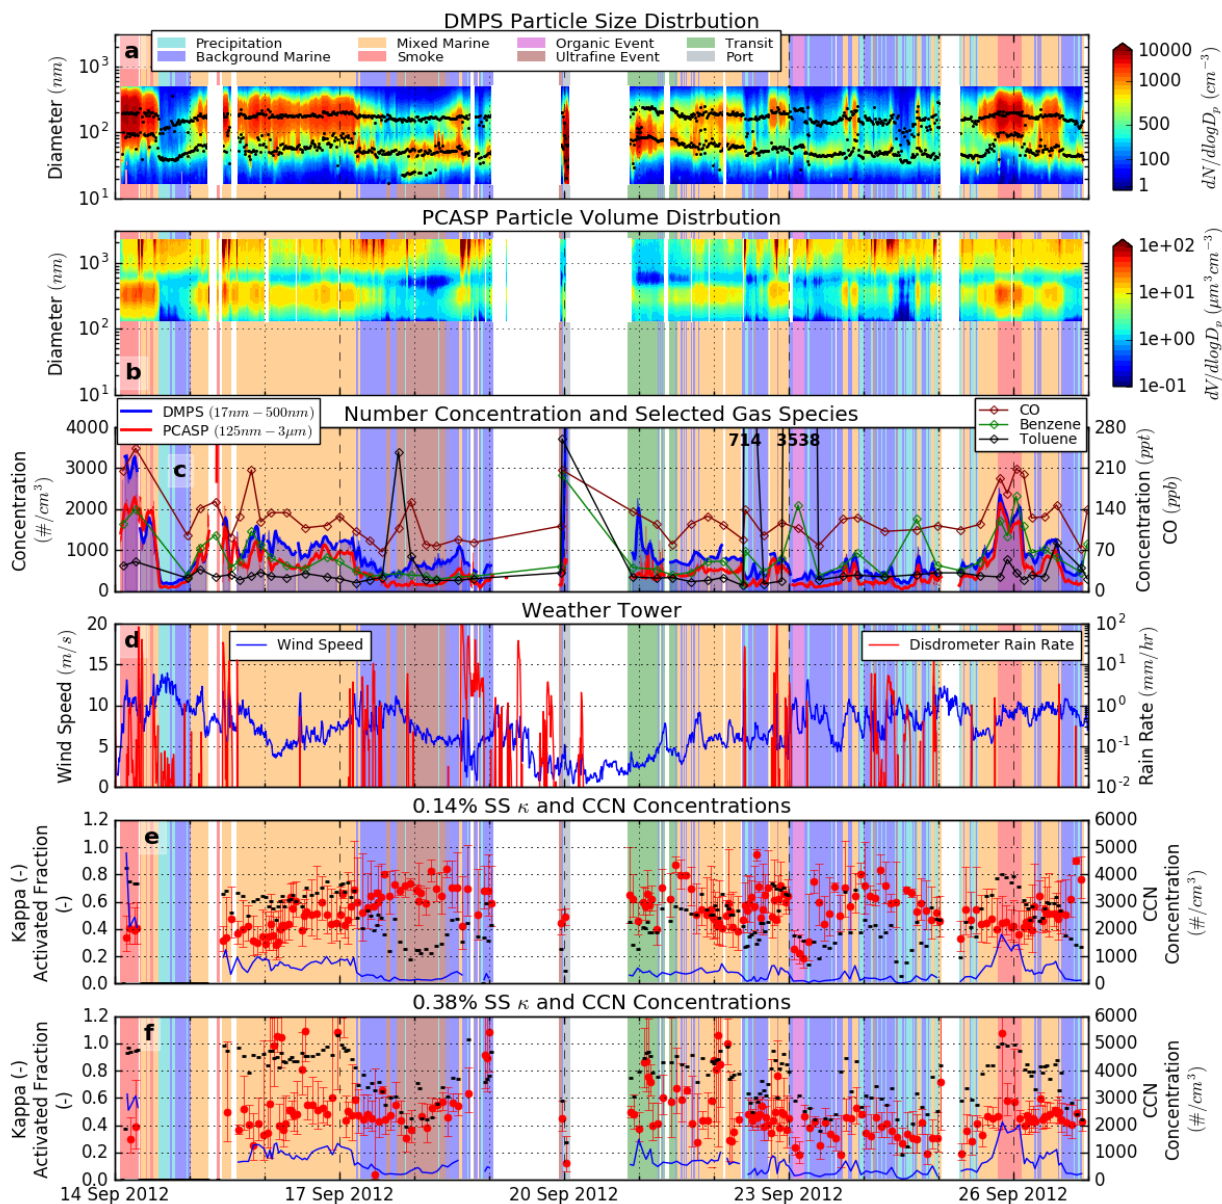

Figure 2: Timelines of measured and derived variables during *Vasco* 2012 cruise. In all figures, background colors correspond to aerosol type classification from the cluster analysis, as indicated in the legend in panel a. (a)  $dN/d\log D_p$  spectra from the CCN system measurements with black dots at best-fit modal median diameters; (b)  $dV/d\log D_p$  spectra derived from the PCASP measurements; (c) total number concentrations measured by the CCN system (blue; shaded below for contrast) and the PCASP (red), with 60 minute boxcar average smoothing; gas canister grab sample concentrations for carbon monoxide, benzene, and toluene are shown on the right axis with colored numbers indicating sample points above the upper scale extent; (d) wind speed and disdrometer rain rate from the *Vasco* weather tower. (e & f)  $\kappa$  parameter (red) and CCN concentrations (blue) for 0.14% and 0.38% supersaturation settings (corresponding approximately to accumulation and Aitken modes, respectively), with total activated particle number fractions ( $CCN_{SS\%} / CN_{Total}$ ) bars in grey. Error bars on  $\kappa$  data points indicate the  $\kappa$  values associated with 25% / 75% activated fraction curve fits.

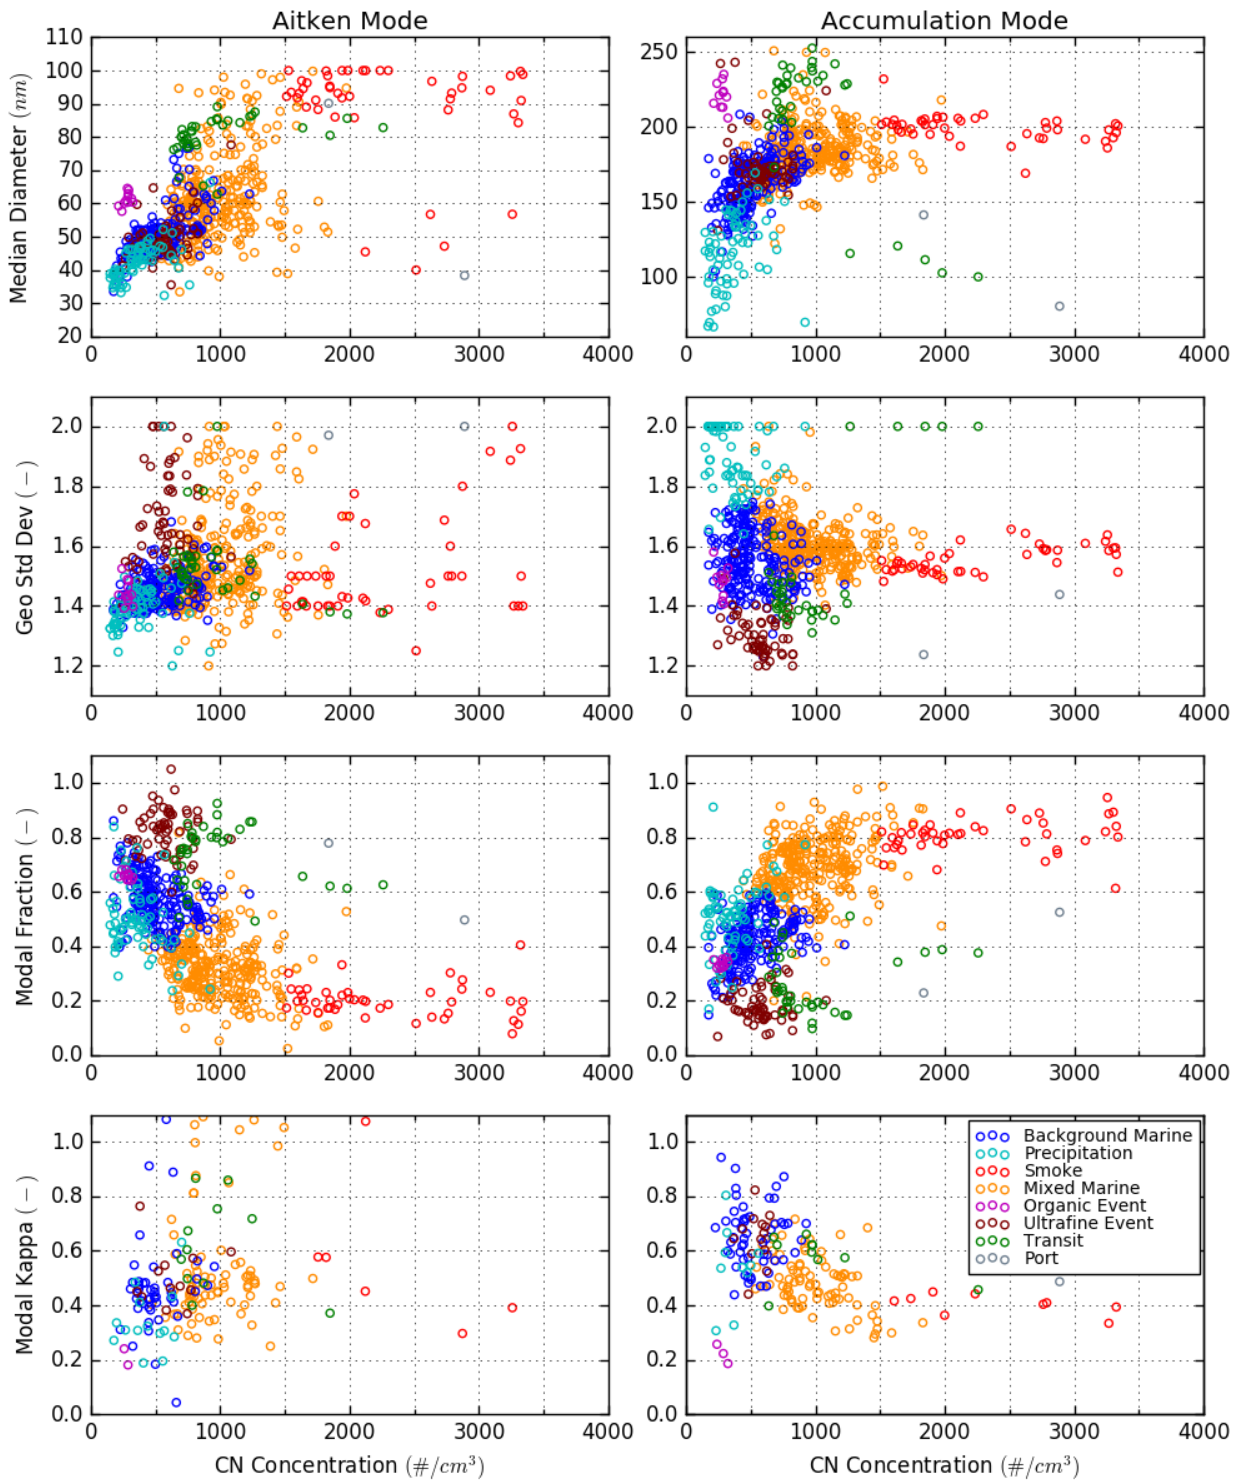



**Figure 3: Parameterized variable values for Aitken and accumulation modes (median diameter, geometric standard deviation, modal fraction) at each of the 15 minute data points during the study, along with  $\kappa$  values for data points at CCNc superstation set points of 0.38% (Aitken mode) and 0.14% (accumulation mode). Each data point is colored according to the cluster type to which it was classified.**

## Normalized $dN/d\log D_p$

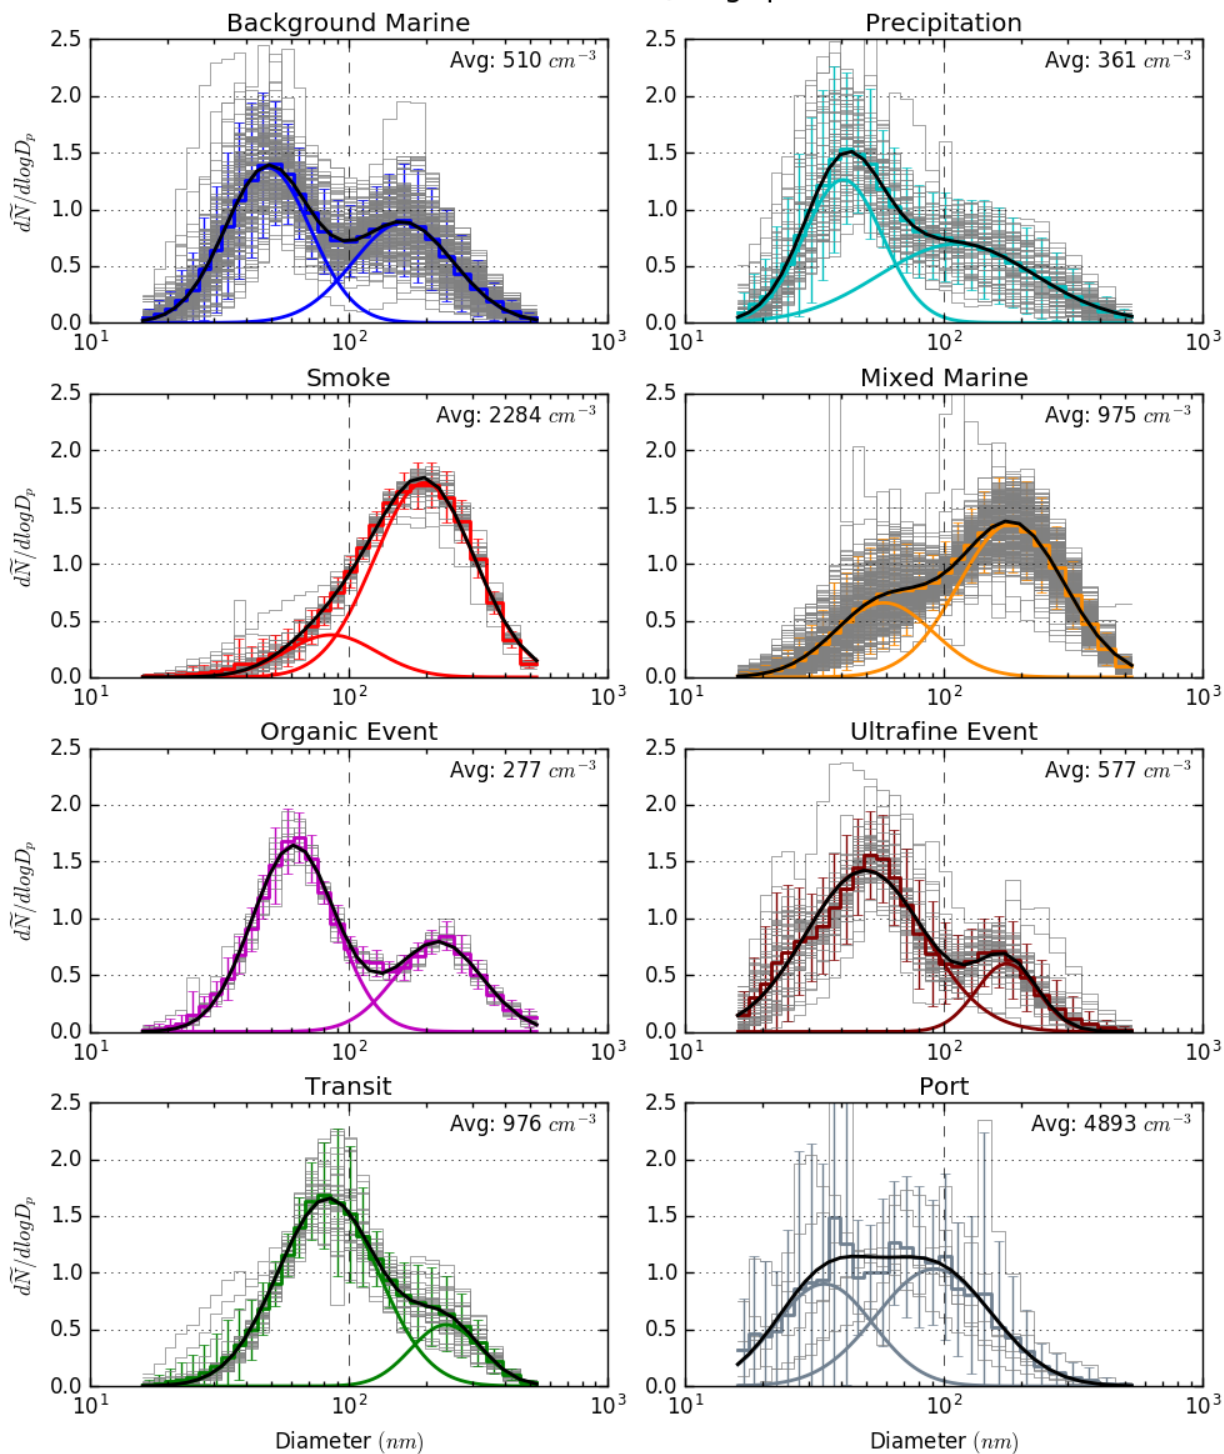

Figure 4: Normalized  $dN/d\log D_p$  particle size distributions for each [spectra-spectrum](#) within identified aerosol population types (grey), the associated average bin values with error bars at 95% confidence interval (colored step lines;  $1.96 * \text{bin standard deviation}$ ), and best fit lognormal modes (colored curves) with bimodal fit (black). The average particle number concentrations of data points within each population type are listed.

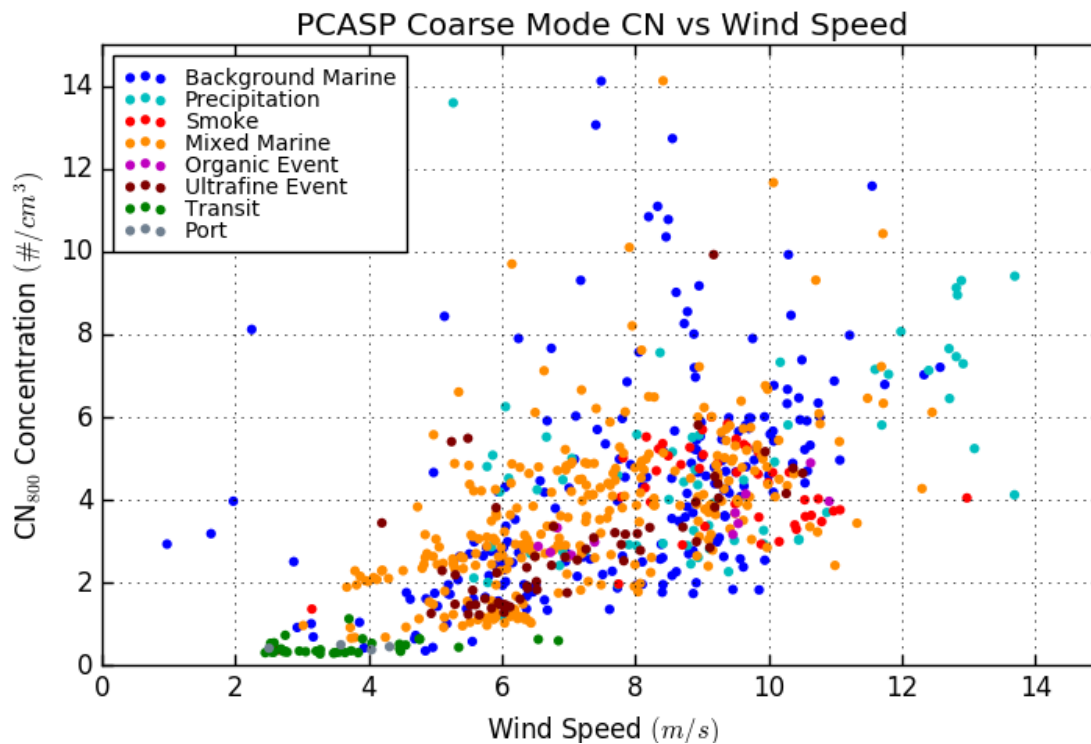

5

Figure 5: Number concentrations of coarse mode particles ( $D_p > 800 \text{ nm}$ ) measured by the PCASP as functions of local surface wind speed measured by the onboard *Vasco* weather station. Each point was averaged over the same approximately 15 minute time period as for the CCN system measurements, and is colored by the aerosol type as described in the text.

**Table 1: Aerosol population type parameters used for clustering and the resulting average values (standard deviations in grey parentheses) for each identified population.**

| Population Type    | Total Number | Aitken Mode                            |                |                      |                    | Accumulation Mode |                |                      |                    |
|--------------------|--------------|----------------------------------------|----------------|----------------------|--------------------|-------------------|----------------|----------------------|--------------------|
|                    |              | Concentration<br>(# cm <sup>-3</sup> ) | Median<br>(nm) | Geometric<br>Std Dev | Number<br>Fraction | Kappa             | Median<br>(nm) | Geometric<br>Std Dev | Number<br>Fraction |
| 1: Back. Marine    | 510 (181)    | 50 (7)                                 | 1.45 (0.05)    | 0.57 (0.08)          | 0.46 (0.17)        | 162 (18)          | 1.55 (0.10)    | 0.42 (0.09)          | 0.65 (0.11)        |
| 2: Precipitation   | 361 (164)    | 42 (5)                                 | 1.40 (0.10)    | 0.50 (0.12)          | 0.34 (0.11)        | 115 (27)          | 1.91 (0.20)    | 0.51 (0.12)          | 0.54 (0.14)        |
| 3: Smoke           | 2280 (606)   | 89 (15)                                | 1.53 (0.17)    | 0.20 (0.06)          | 0.56 (0.25)        | 199 (9)           | 1.55 (0.04)    | 0.81 (0.06)          | 0.40 (0.03)        |
| 4: Mixed Marine    | 975 (271)    | 62 (13)                                | 1.54 (0.18)    | 0.32 (0.13)          | 0.54 (0.23)        | 184 (17)          | 1.61 (0.08)    | 0.68 (0.12)          | 0.48 (0.10)        |
| 5: Organic Event   | 277 (30)     | 61 (2)                                 | 1.45 (0.04)    | 0.66 (0.01)          | 0.21 (0.03)        | 221 (8)           | 1.48 (0.05)    | 0.34 (0.01)          | 0.22 (0.03)        |
| 6: Ultrafine Event | 577 (158)    | 50 (6)                                 | 1.69 (0.16)    | 0.82 (0.08)          | 0.50 (0.10)        | 174 (19)          | 1.30 (0.07)    | 0.19 (0.06)          | 0.65 (0.09)        |
| 7: Transit         | 976 (384)    | 80 (6)                                 | 1.53 (0.12)    | 0.73 (0.11)          | 0.62 (0.16)        | 209 (42)          | 1.50 (0.21)    | 0.26 (0.11)          | 0.58 (0.08)        |
| 8: Port            | 4890 (2550)  | 42 (22)                                | 1.62 (0.37)    | 0.49 (0.18)          | 0.13 (-)           | 87 (26)           | 1.57 (0.22)    | 0.53 (0.18)          | 0.49 (-)           |

**Table 21: Average values (standard deviations in grey parentheses) for identified aerosol population types. Shown are number of CCN system data points classified as each type, total number concentrations for the PCASP (125 nm–3 μm) and CCN system (17–500 nm), CCN number concentrations and activated fractions for each CCNc supersaturation set point, and measured κ values for the accumulation mode (0.14% SS) and Aitken mode (0.38% SS) set points.**

| Population Type    | # CCN Meas. (#) | PCASP Number (#/cm <sup>3</sup> ) | CCN system Number (#/cm <sup>3</sup> ) | 0.14% SS                 |                    |                    | 0.38% SS                 |                    |                    | 0.53% SS                 |                    | 0.71% SS                 |                    | 0.85% SS                 |                    |
|--------------------|-----------------|-----------------------------------|----------------------------------------|--------------------------|--------------------|--------------------|--------------------------|--------------------|--------------------|--------------------------|--------------------|--------------------------|--------------------|--------------------------|--------------------|
|                    |                 |                                   |                                        | CCN (#/cm <sup>3</sup> ) | Act Frac (-)       | κ (-)              | CCN (#/cm <sup>3</sup> ) | Act Frac (-)       | κ (-)              | CCN (#/cm <sup>3</sup> ) | Act Frac (-)       | CCN (#/cm <sup>3</sup> ) | Act Frac (-)       | CCN (#/cm <sup>3</sup> ) | Act Frac (-)       |
| 1: Back. Marine    | 214             | 231 (111)                         | 510 (181)                              | 213 (101)                | 0.38 (0.09)        | 0.65 (0.11)        | 320 (148)                | 0.60 (0.12)        | 0.46 (0.17)        | 416 (194)                | 0.74 (0.11)        | 444 (239)                | 0.81 (0.09)        | 480 (210)                | 0.87 (0.05)        |
| 2: Precipitation   | 67              | 142 (79)                          | 361 (164)                              | 96 (58)                  | 0.24 (0.11)        | 0.54 (0.14)        | 243 (135)                | 0.48 (0.15)        | 0.34 (0.11)        | 352 (175)                | 0.65 (0.15)        | 265 (82)                 | 0.71 (0.09)        | 228 (100)                | 0.79 (0.03)        |
| 3: Smoke           | 44              | 1800 (273)                        | 2280 (606)                             | 1720 (388)               | 0.72 (0.04)        | 0.40 (0.03)        | 2340 (480)               | 0.93 (0.02)        | 0.56 (0.25)        | 1990 (359)               | 0.97 (0.02)        | 2080 (396)               | 0.98 (0.05)        | 2150 (523)               | 0.99 (0.02)        |
| 4: Mixed Marine    | 294             | 689 (295)                         | 975 (271)                              | 591 (201)                | 0.58 (0.08)        | 0.48 (0.10)        | 827 (270)                | 0.83 (0.07)        | 0.54 (0.23)        | 861 (247)                | 0.89 (0.10)        | 876 (244)                | 0.94 (0.06)        | 893 (271)                | 0.96 (0.05)        |
| 5: Organic Event   | 11              | 151 (19)                          | 277 (30)                               | 88 (10)                  | 0.31 (0.02)        | 0.22 (0.03)        | 144 (9)                  | 0.53 (0.01)        | 0.21 (0.03)        | 182 (26)                 | 0.72 (0.01)        | 268 (56)                 | 0.89 (0.14)        | 257 (24)                 | 0.93 (0.07)        |
| 6: Ultrafine Event | 59              | 163 (58)                          | 577 (158)                              | 138 (45)                 | 0.25 (0.06)        | 0.65 (0.09)        | 361 (172)                | 0.56 (0.11)        | 0.50 (0.10)        | 373 (168)                | 0.65 (0.12)        | 439 (163)                | 0.72 (0.07)        | 473 (147)                | 0.79 (0.10)        |
| 7: Transit         | 36              | 311 (44)                          | 976 (384)                              | 363 (87)                 | 0.37 (0.06)        | 0.58 (0.08)        | 772 (263)                | 0.81 (0.09)        | 0.62 (0.16)        | 832 (423)                | 0.87 (0.05)        | 877 (370)                | 0.90 (0.02)        | 878 (195)                | 0.95 (0.03)        |
| 8: Port            | 6               | 671 (210)                         | 4890 (2550)                            | 251 (-)*                 | 0.09 (-)*          | 0.49 (-)*          | 1126 (-)*                | 0.26 (-)*          | 0.13 (-)*          | 3936 (-)*                | 0.40 (-)*          | 1742 (289)               | 0.57 (0.22)        | 2080 (-)*                | 0.45 (-)*          |
| <b>All Types</b>   | <b>731</b>      | <b>503 (455)</b>                  | <b>851 (677)</b>                       | <b>450 (388)</b>         | <b>0.47 (0.16)</b> | <b>0.54 (0.14)</b> | <b>675 (516)</b>         | <b>0.72 (0.17)</b> | <b>0.50 (0.21)</b> | <b>698 (555)</b>         | <b>0.79 (0.15)</b> | <b>724 (512)</b>         | <b>0.85 (0.13)</b> | <b>723 (502)</b>         | <b>0.90 (0.10)</b> |

\* Only one datapoint; Note that Port measurements fluctuated as the Vasco entered port
